# Supplementary material for: Structured copper-hydride nanoclusters provide insight into the surface-vacancy-defect to non-defect structural evolution
Source: Royal Society of Chemistry journal article supplement (doi:10.1039/d2sc03239b), 2022-01-01
Supplement: d2sc03239b1.pdf [file d2sc03239b1.pdf]

## Structured Copper-hydride Nanoclusters Provide Insight into the Surface-vacancy-defect to Non-defect Structural Evolution

Yizheng Bao,<sup>†</sup> Xiaohang Wu,<sup>†</sup> Bing Yin,<sup>‡</sup> Xi Kang, Zidong Lin, Huijuan Deng, Haizhu Yu, Shan Jin,<sup>\*</sup> Shuang Chen, <sup>\*</sup> Manzhou Zhu<sup>\*</sup>

Institutes of Physical Science and Information Technology and Centre for Atomic Engineering of Advanced Materials, Key Laboratory of Structure and Functional Regulation of Hybrid Materials of Ministry of Education, Department of Chemistry and Anhui Province Key Laboratory of Chemistry for Inorganic/Organic Hybrid Functionalized Materials, Anhui Graphene Engineering Laboratory, Anhui University, Hefei, Anhui 230601, China

<sup>‡</sup>Y.Z Bao, X.H. Wu, and B. Yin contributed equally.

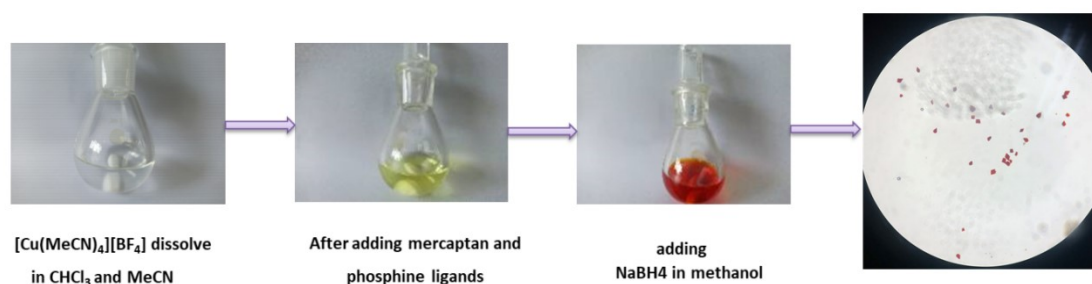

Figure S1. Scheme of the synthetic procedure for [Cu<sub>28</sub>(C<sub>6</sub>H<sub>11</sub>S)<sub>18</sub>(PPh<sub>2</sub>Py)<sub>3</sub>(H)<sub>8</sub>][BF<sub>4</sub>]<sub>2</sub> nanoclusters (Cu<sub>28</sub>-PPh<sub>2</sub>Py)

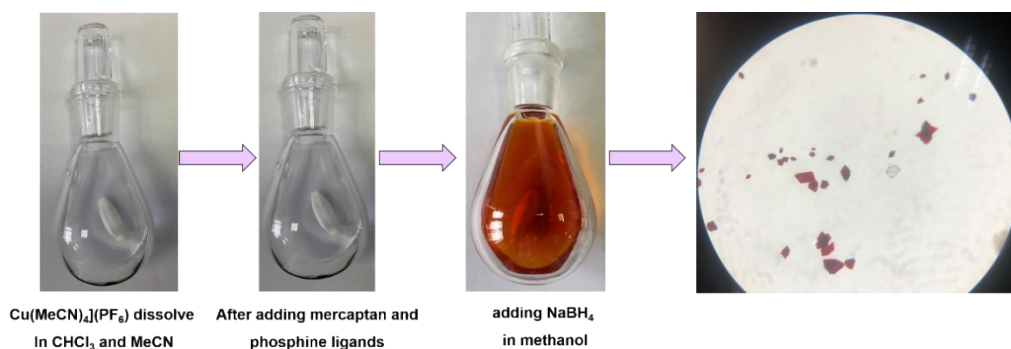

Figure S2. Scheme of the synthetic procedure for [Cu<sub>29</sub>(SAdm)<sub>15</sub>Cl<sub>3</sub>(P(Ph-Cl)<sub>3</sub>)<sub>4</sub>H<sub>10</sub>](PF<sub>6</sub>)(Cu<sub>29</sub>-P(Ph-Cl)<sub>3</sub>).

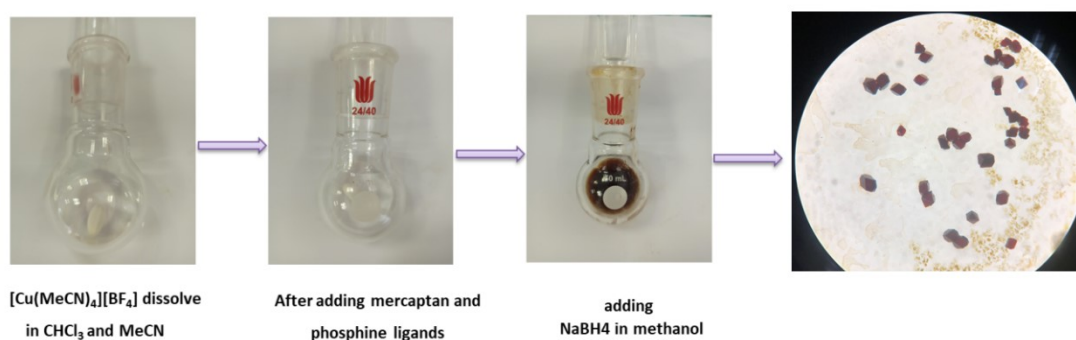

Figure S3. Scheme of the synthetic procedure for  $[\text{Cu}_{29}(\text{C}_6\text{H}_{11})_{18}((\text{Ph-}^i\text{Pr})_3\text{P})_4\text{H}_{10}]^+$  ( $\text{Cu}_{29}\text{-P}(\text{Ph-Me})_3$ ).

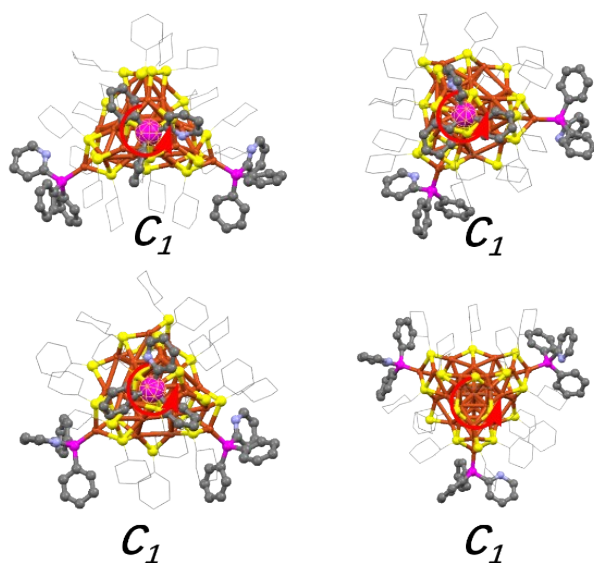

Figure S4. The overall structure of  $\text{Cu}_{28}\text{-PPh}_2\text{Py}$  exhibits four  $C_1$  symmetry axes.

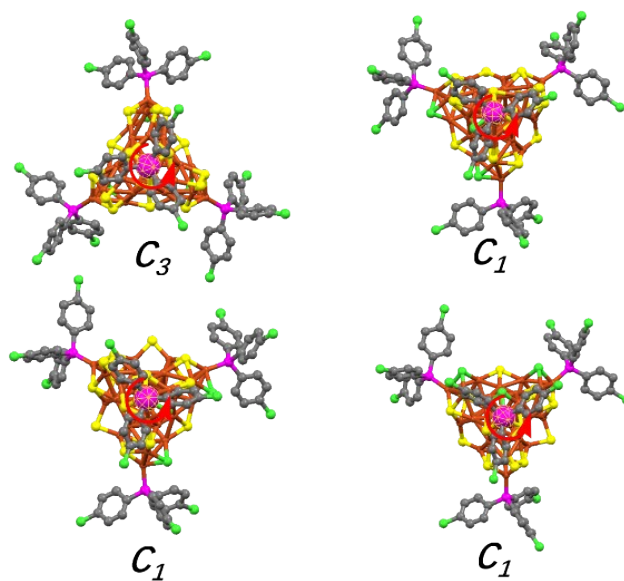

Figure S5. The overall structure of  $\text{Cu}_{29}\text{-P}(\text{Ph-Cl})_3$  exhibits one  $C_3$  and three  $C_1$  symmetry axes.

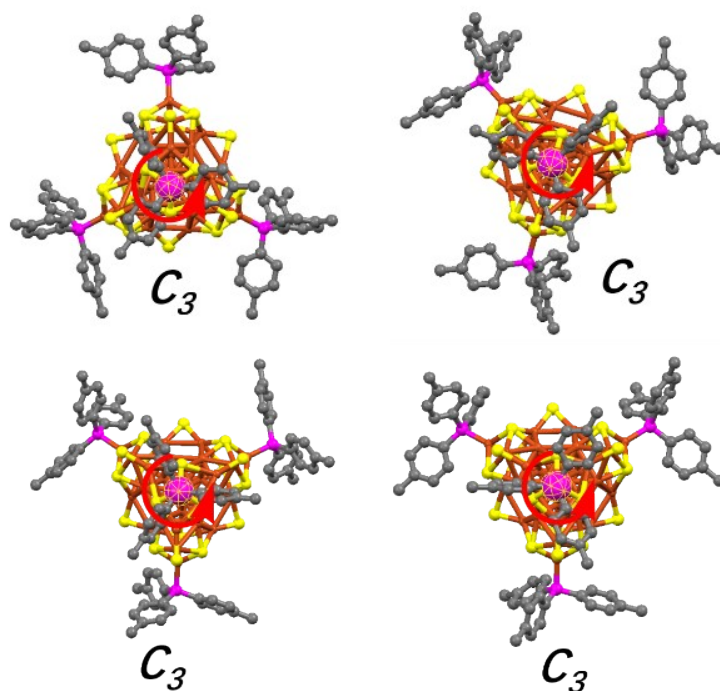

Figure S6. The overall structure of  $\text{Cu}_{29}\text{-P(Ph-Me)}_3$  exhibits four  $C_3$  symmetry axes.

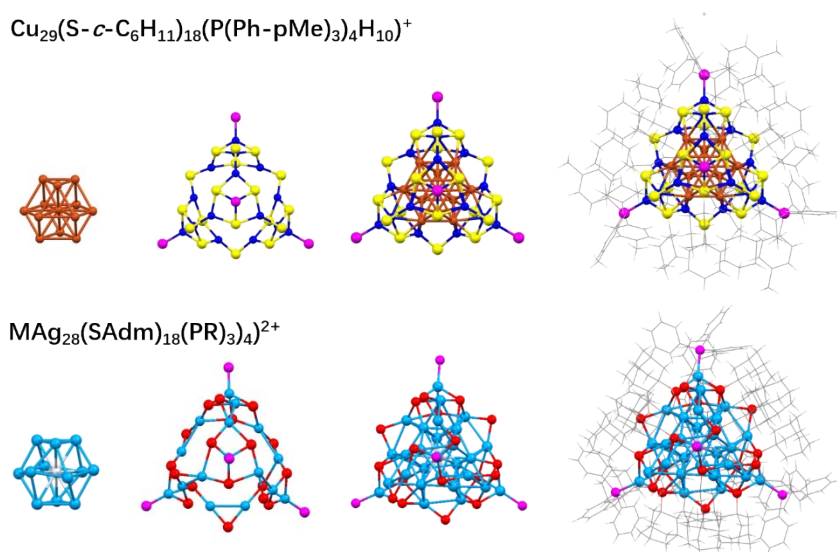

Figure S7. The structural anatomies of  $\text{Cu}_{29}(\text{S-}i\text{-C}_6\text{H}_{11})_{18}(\text{P(Ph-}i\text{pMe)}_3)_4$  and  $\text{Mg}_{28}(\text{S-}i\text{-C}_6\text{H}_{11})_{18}(\text{PPh}_3)_4$ . The H in  $\text{Cu}_{29}$  is not shown. Color label: copper/blue = Cu, sky blue = Ag, yellow/red = S, purple = P, gray = C.

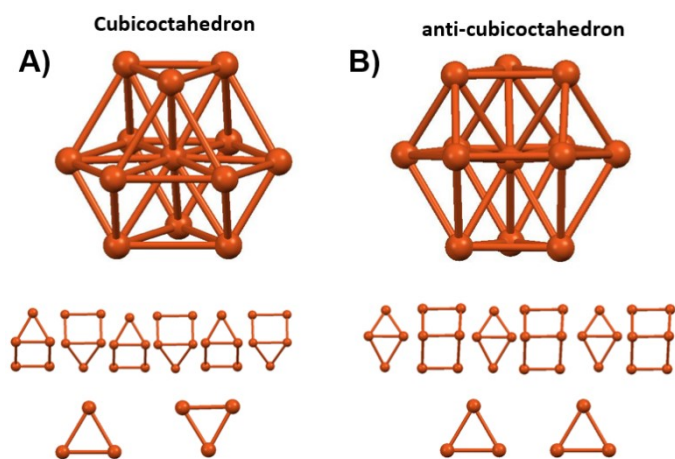

Figure S8. The difference between a cubic octahedron and an anti-cube octahedron  $\text{Cu}_{13}$ .

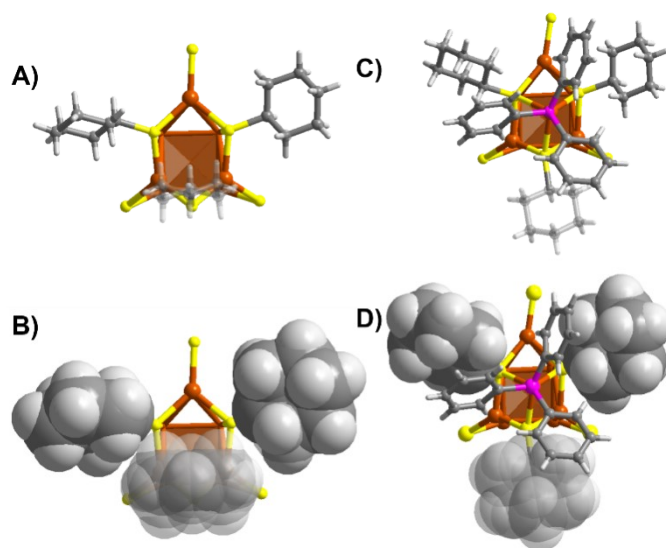

Figure S9. The spatial arrangement of thiol ligands in the  $\text{Cu}_3\text{S}_6$  ring (Motif 1a in Figure 2), and  $\text{Cu}_4\text{S}_6\text{P}_1$  (Motifs 3a/4a in Figure 2).

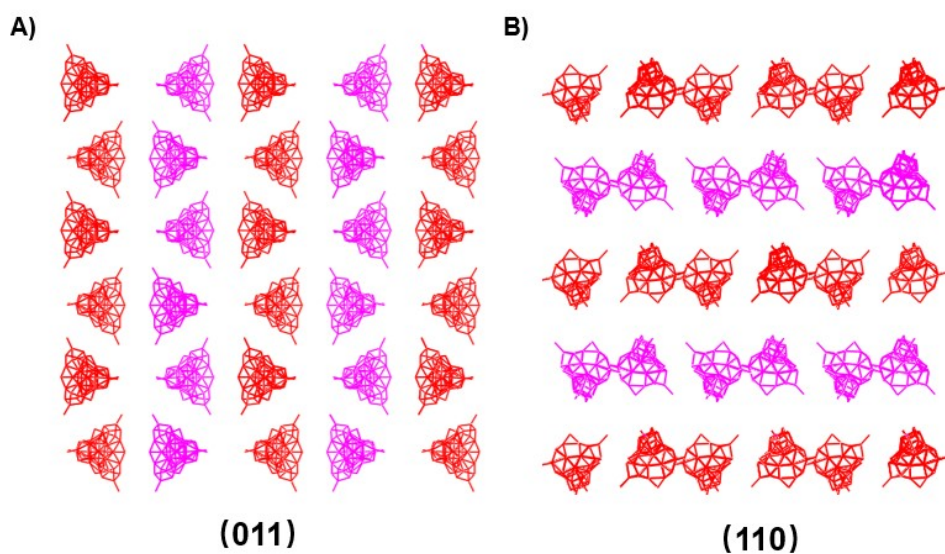

Figure S10. The crystallographic arrangement of  $[\text{Cu}_{28}(\text{S-}i\text{-C}_6\text{H}_{11})_{18}(\text{PPh}_2\text{Py})_3\text{H}_8]^{2+}$  nanoclusters.

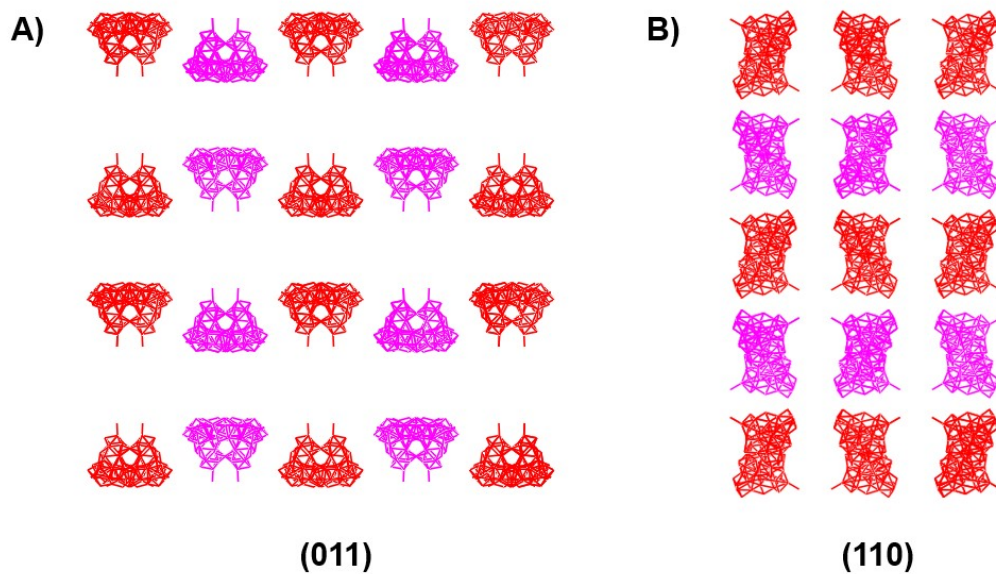

Figure S11. The crystallographic arrangement of  $[\text{Cu}_{29}(\text{SAdm})_{15}\text{Cl}_3(\text{P}(\text{Ph-Cl})_3)_4\text{H}_{10}](\text{PF}_6)$  nanoclusters.



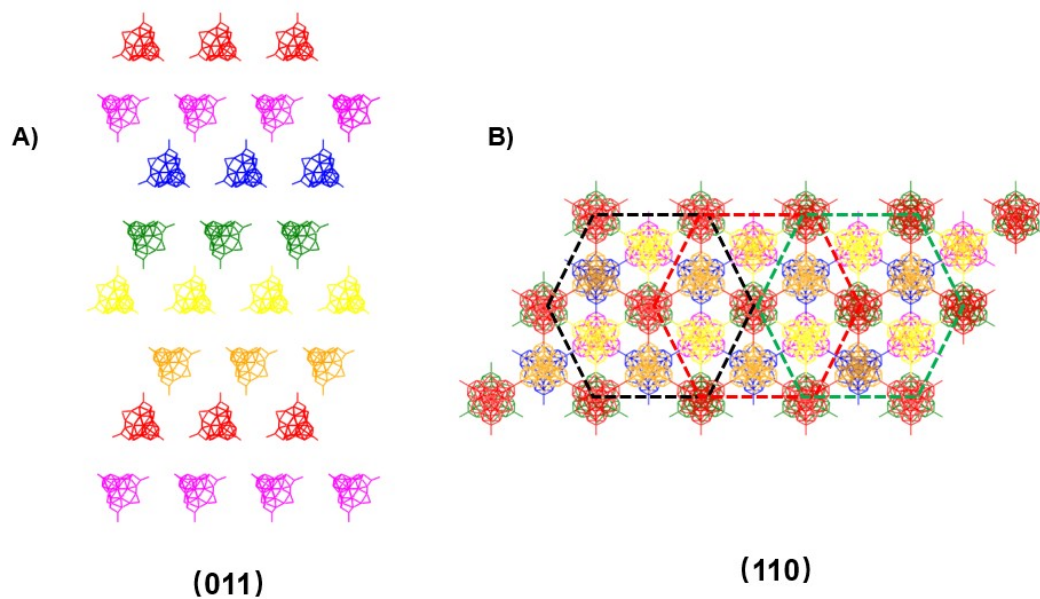

Figure S12. 6HLH crystallographic arrangement of  $[\text{Cu}_{29}(\text{S-}i\text{-C}_6\text{H}_{11})_{18}(\text{P}(\text{Ph-}i\text{pMe})_3)_4\text{H}_{10}]^+$  nanoclusters.

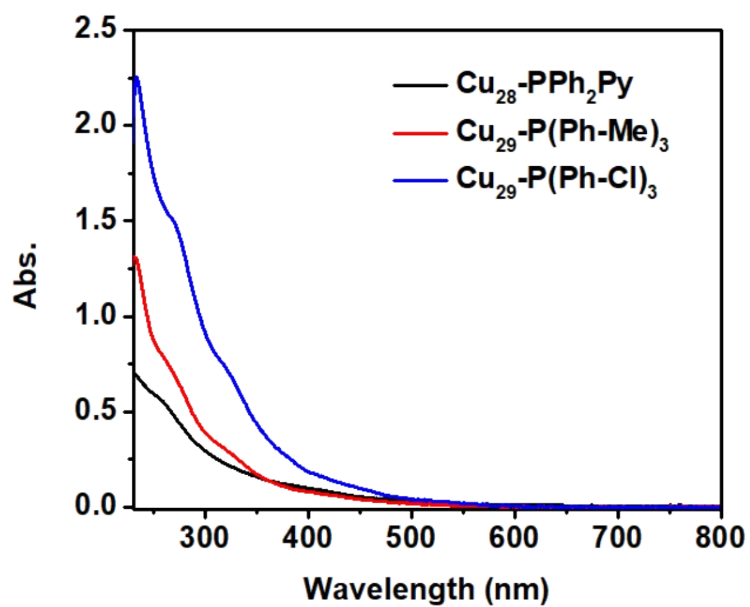

Figure S13. The UV-vis spectra of  $\text{Cu}_{28}\text{-PPh}_2\text{Py}$ ,  $\text{Cu}_{29}\text{-P(Ph-Cl)}_3$ , and  $\text{Cu}_{29}\text{-P(Ph-Me)}_3$ .

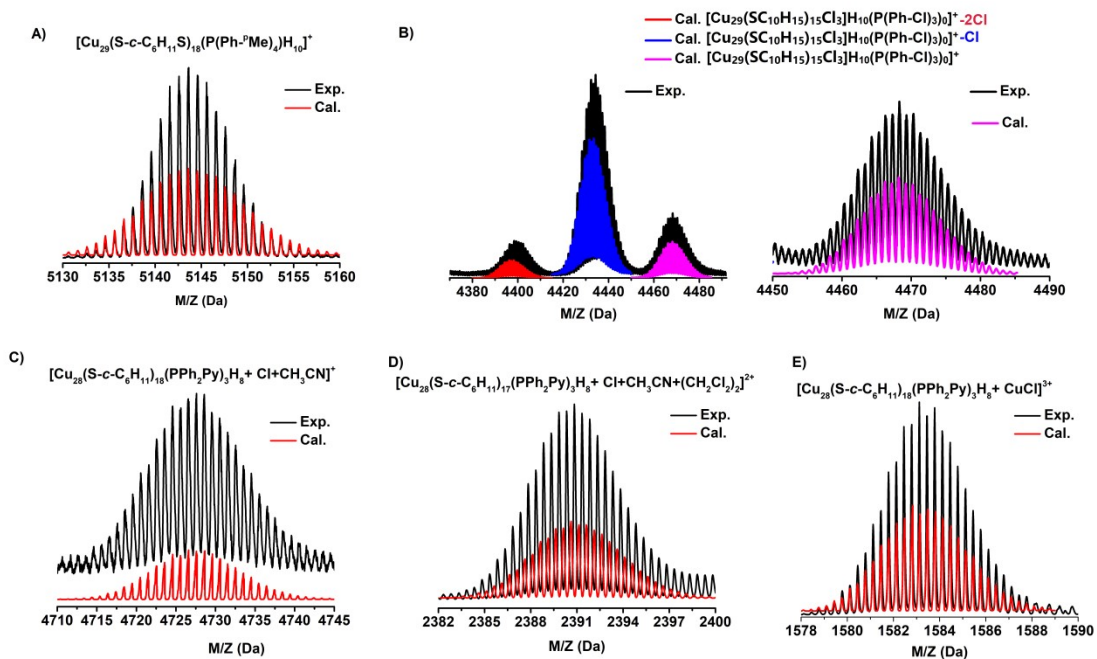

Figure S14. Experimental isotopic patterns with simulated ones.

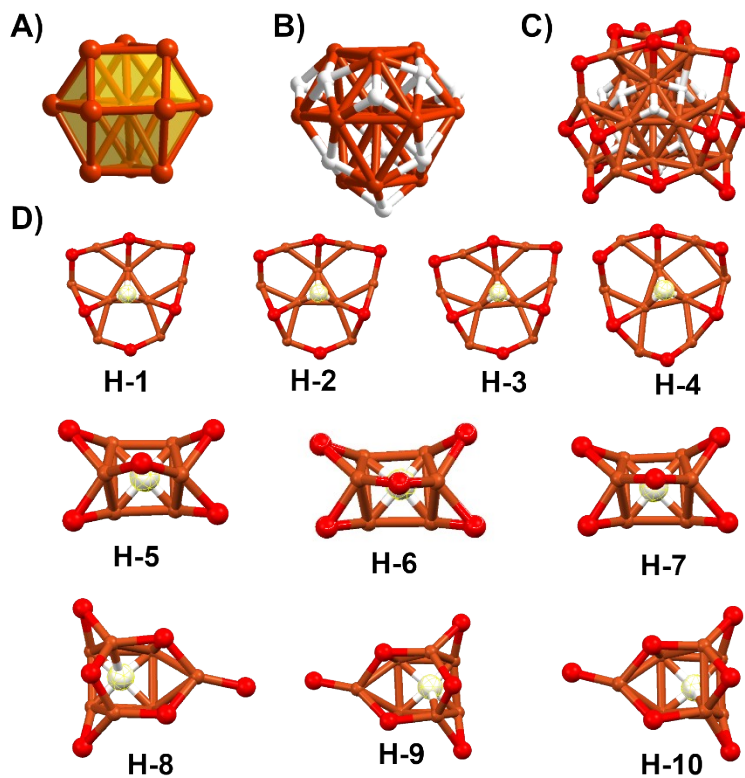

Figure S15. Structural anatomies of  $[\text{Cu}_{25}(\text{SPhCl}_2)_{18}\text{H}_{10}]$  and bonding mode around H-.

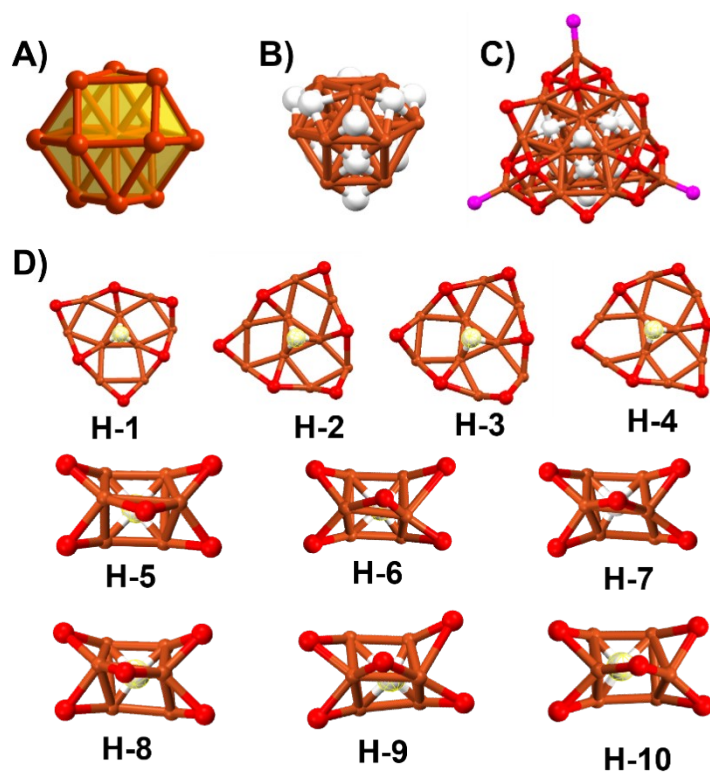

Figure S16. Structural anatomies of  $\text{Cu}_{29}\text{-P(Ph-Me)}_3$  and bonding mode around H-

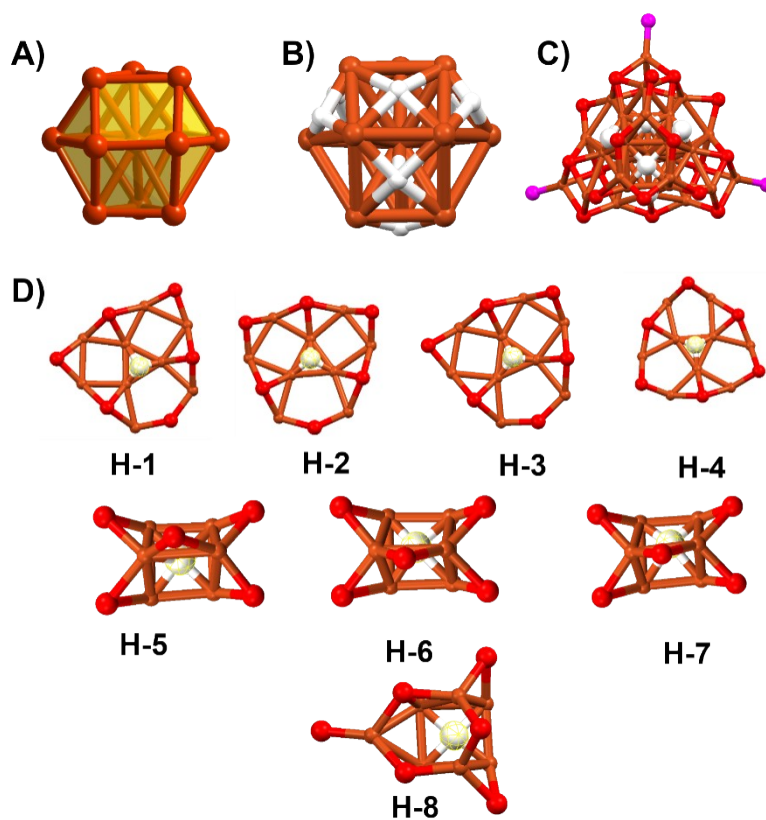

Figure S17. Structural anatomies of  $\text{Cu}_{28}\text{-PPh}_2\text{Py}$  and bonding mode around H-.



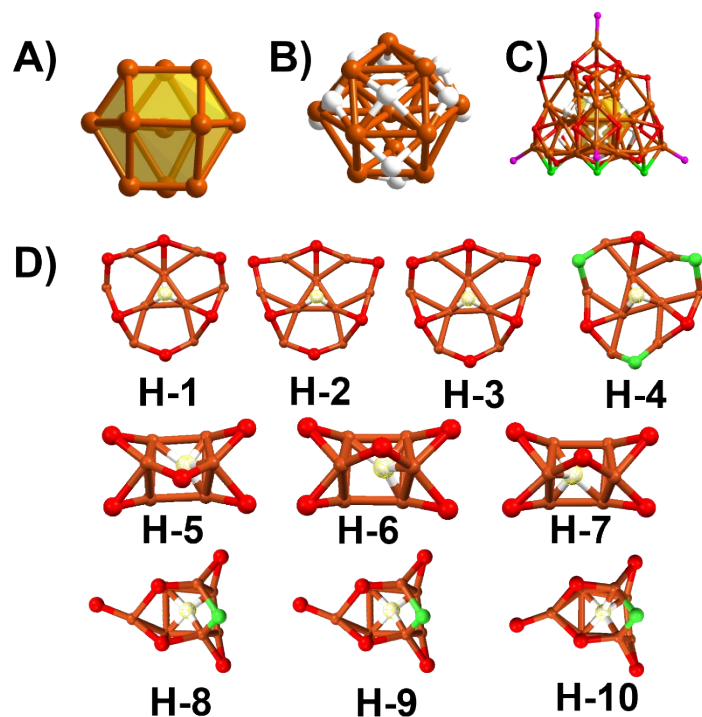

Figure S18. Structural anatomies of  $\text{Cu}_{29}\text{-P(Ph-Cl)}_3$  and bonding mode around H-.

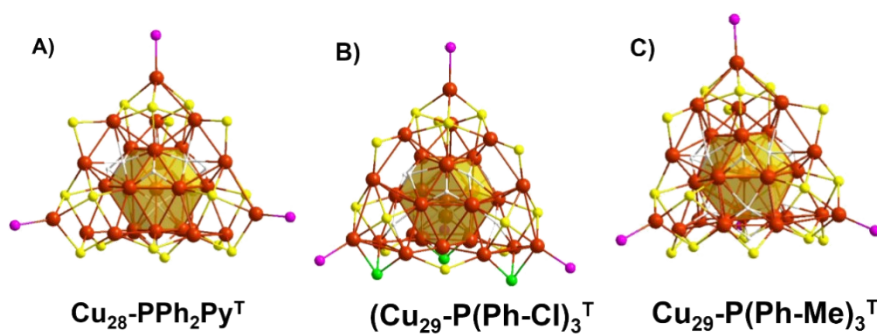

**Figure S19.** A) Optimized structure of  $\text{Cu}_{28}\text{-PPh}_2\text{Py}^{\text{T}}$ ; B) optimized structure of  $(\text{Cu}_{29}\text{-P(Ph-Cl)}_3)^{\text{T}}$ ; C) optimized structure of  $\text{Cu}_{29}\text{-P(Ph-Me)}_3^{\text{T}}$ . All carbon, hydrogen, and nitrogen atoms on the ligands are omitted. Color label: copper = Cu, yellow = S, purple = P, white = H.

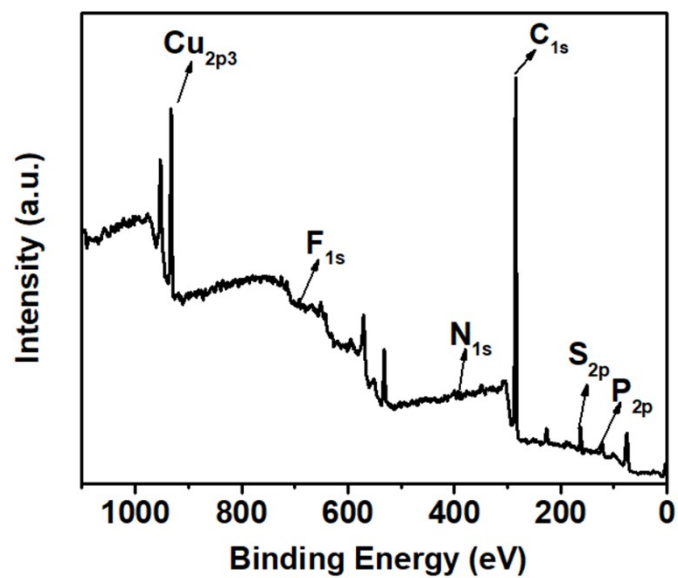

Figure S20. XPS spectra of  $[\text{Cu}_{28}(\text{S-}i\text{-C}_6\text{H}_{11})_{18}(\text{PPh}_2\text{Py})_3\text{H}_8]^{2+}$ .

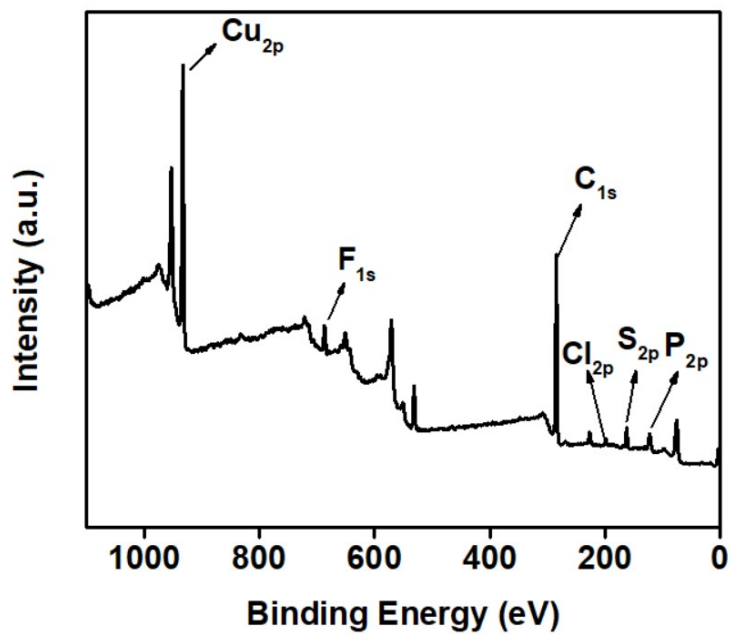

Figure S21. XPS spectra of  $[\text{Cu}_{29}(\text{SAdm})_{15}\text{Cl}_3(\text{P}(\text{Ph-Cl})_3)_4\text{H}_{10}](\text{PF}_6)$ .

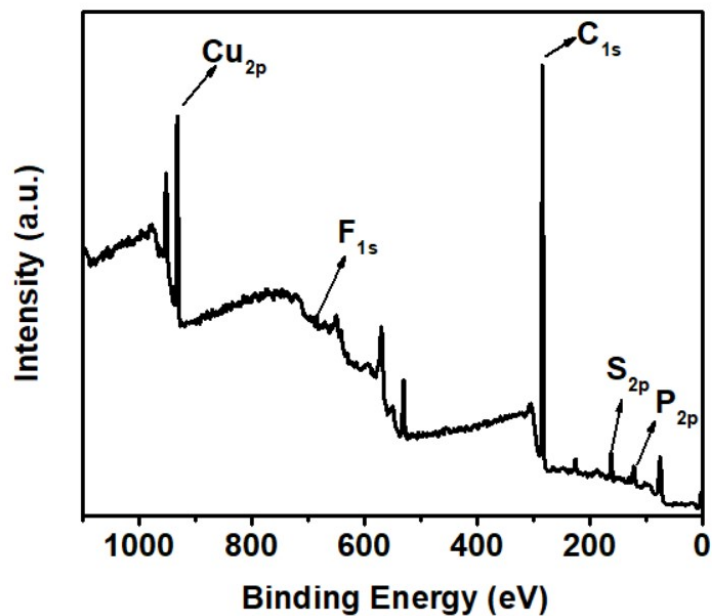

Figure S22. XPS spectra of  $[\text{Cu}_{29}(\text{S-}c\text{-C}_6\text{H}_{11})_{18}(\text{P}(\text{Ph-pMe})_3)_4\text{H}_{10}]^+$ .

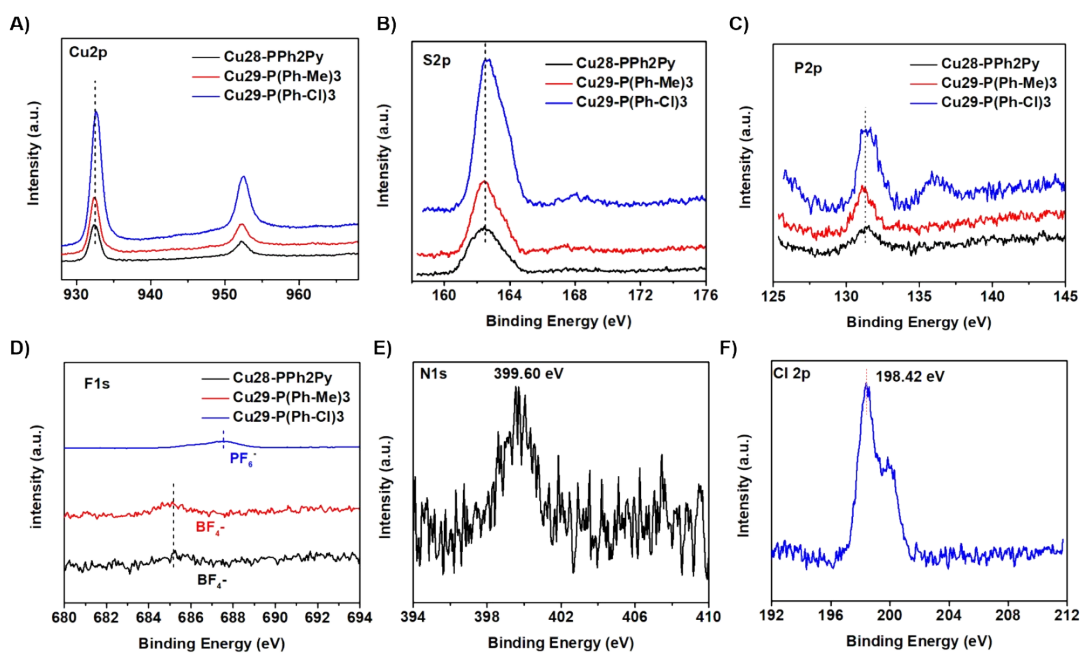

Figure S23. Survey spectrum of  $[\text{Cu}_{29}(\text{S-}c\text{-C}_6\text{H}_{11})_{18}(\text{P}(\text{Ph-pMe})_3)_4\text{H}_{10}](\text{BF}_4)$ ,  $[\text{Cu}_{29}(\text{SAdm})_{15}\text{Cl}_3(\text{P}(\text{Ph-Cl})_3)_4\text{H}_{10}](\text{PF}_6)$  and  $[\text{Cu}_{28}(\text{S-}c\text{-C}_6\text{H}_{11})_{18}(\text{PPh}_2\text{Py})_3\text{H}_8](\text{BF}_4)_2$ . (A-F) High-resolution XPS spectra of Cu2p, S2p, P2p, F1s, N1s and Cl2p.

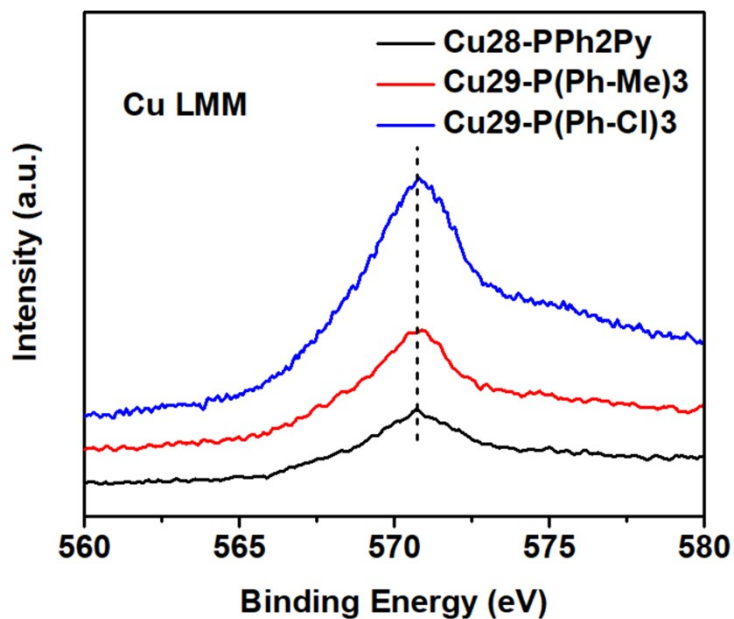

Figure S24. Cu LMM Auger spectrum of  $[\text{Cu}_{29}(\text{S-}i\text{-C}_6\text{H}_{11})_{18}(\text{P}(\text{Ph-}^i\text{Me})_3)_4\text{H}_{10}](\text{BF}_4)$ ,  $[\text{Cu}_{29}(\text{SAdm})_{15}\text{Cl}_3(\text{P}(\text{Ph-Cl})_3)_4\text{H}_{10}](\text{PF}_6)$  and  $[\text{Cu}_{28}(\text{S-}i\text{-C}_6\text{H}_{11})_{18}(\text{PPh}_2\text{Py})_3\text{H}_8](\text{BF}_4)_2$ .

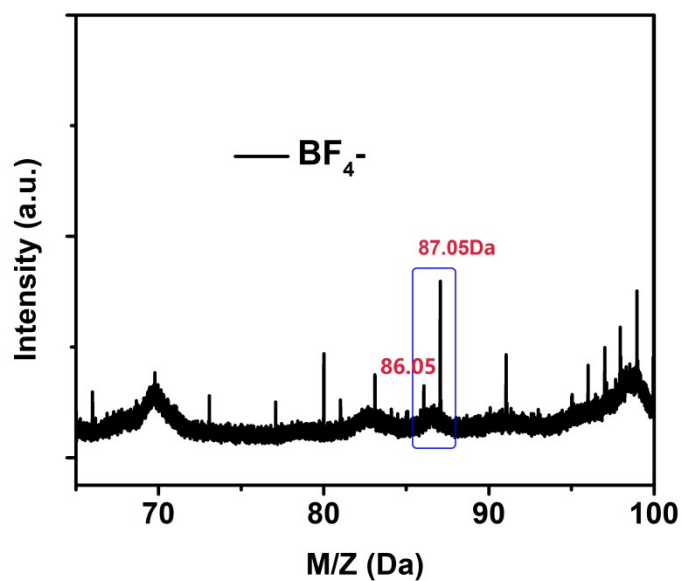

Figure S25. ESI-MS result of the  $\text{BF}_4^-$  counterion in  $[\text{Cu}_{28}(\text{S-}i\text{-C}_6\text{H}_{11})_{18}(\text{PPh}_2\text{Py})_3\text{H}_8](\text{BF}_4)_2$ . This suggests that the  $\text{Cu}_{28}$ -PPh<sub>2</sub>py contains counter ions  $\text{BF}_4^-$ , although it was not observed in the crystal structure.

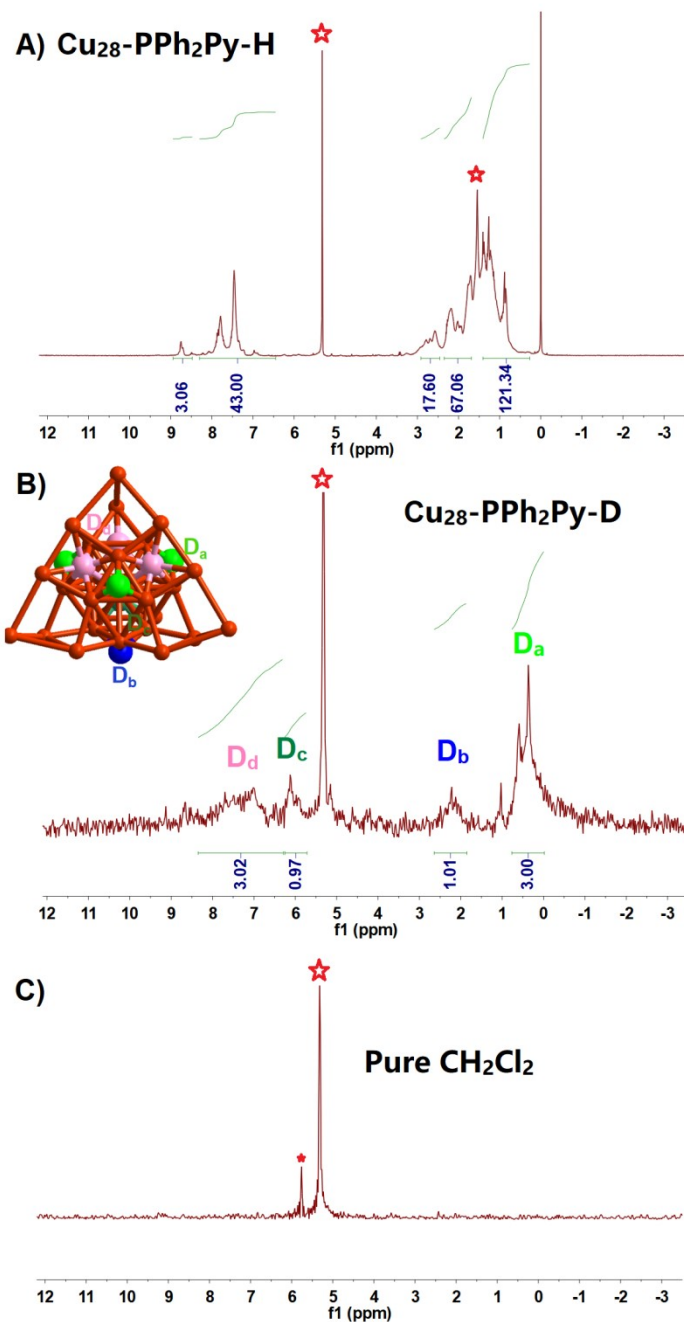

Figure S26. A) The  $^1\text{H}$ -NMR of  $\text{Cu}_{28}\text{-PPh}_2\text{Py-H}$  dissolved in  $\text{CD}_2\text{Cl}_2$ . B) The  $^2\text{H}$ -NMR of  $\text{Cu}_{28}\text{-PPh}_2\text{Py-D}$  dissolved in  $\text{CH}_2\text{Cl}_2$ . C) The  $^2\text{H}$ -NMR of pure  $\text{CH}_2\text{Cl}_2$ , which is for calibration. Asterisked peaks are solvent peaks (5.32 ppm for  $\text{CH}_2\text{Cl}_2$ , and 1.54 ppm for  $\text{H}_2\text{O}$ ). The inset in Figure S26B is optimized geometry of the  $\text{Cu}_{28}\text{-PPh}_2\text{Py}$  obtained from DFT (ligands not shown); the four different D (or H) atoms, viz.,  $\text{D}_a$ ,  $\text{D}_b$ ,  $\text{D}_c$ , and  $\text{D}_d$  shown in pale green, blue, green and dark pink, respectively. Cu atoms are shown in brown. Three  $\text{D}_a$  (or  $\text{H}_a$  shown by the pale green sphere) cap the three Cu triangles on the top half of the core and one  $\text{D}_b$  (or  $\text{H}_b$  shown by the blue sphere) caps the downward-facing Cu triangle ( $\text{Cu}_3$ ) in the core. Three  $\text{D}_d$  (or  $\text{H}_d$ ) covering the three Cu quadrilateral ( $\text{Cu}_4$ ) on the top half of the core and one  $\text{D}_c$  (or  $\text{H}_c$ ) are encapsulated in trigonal prismatic (tp) cages.



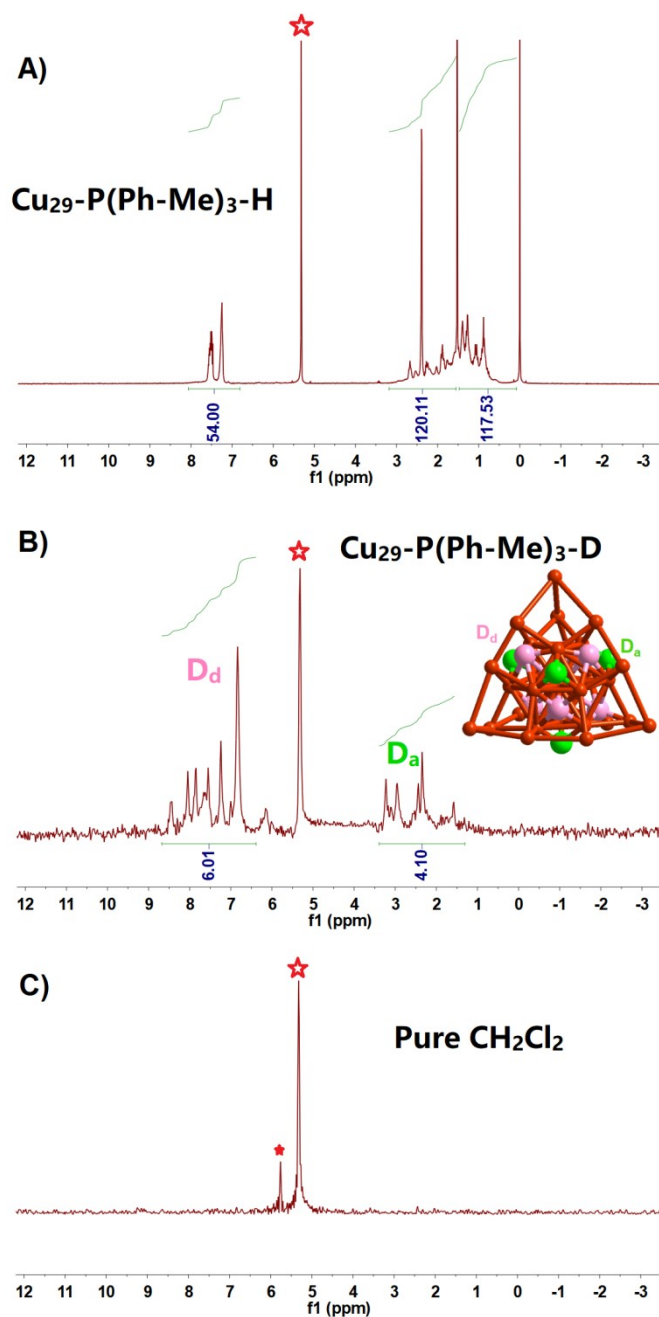

Figure S27. A) The  $^1\text{H}$ -NMR of  $\text{Cu}_{29}\text{-P(Ph-Me)-H}$  dissolved in  $\text{CD}_2\text{Cl}_2$ . B) The  $^2\text{H}$ -NMR of  $\text{Cu}_{29}\text{-P(Ph-Me)-D}$  dissolved in  $\text{CH}_2\text{Cl}_2$ . C) The  $^2\text{H}$ -NMR of pure  $\text{CH}_2\text{Cl}_2$ , which is for calibration. Asterisked peaks are solvent peaks (5.32 ppm for  $\text{CH}_2\text{Cl}_2$ , and 1.54 ppm for  $\text{H}_2\text{O}$ ). The inset in Figure S27B is optimized geometry of the  $\text{Cu}_{29}\text{-P(Ph-Me)}$  obtained from DFT (ligands not shown); the two different D (or H) atoms, viz.,  $\text{D}_a$ ,  $\text{D}_d$  shown in pale green and dark pink, respectively. Cu atoms are shown in brown. Four  $\text{D}_a$  (or  $\text{H}_a$  shown by the pale green sphere) cap the four Cu triangles of the core. Six  $\text{D}_d$  (or  $\text{H}_d$ ) covering the six Cu quadrilateral ( $\text{Cu}_4$ ) of the core are encapsulated in trigonal prismatic (tp) cages.

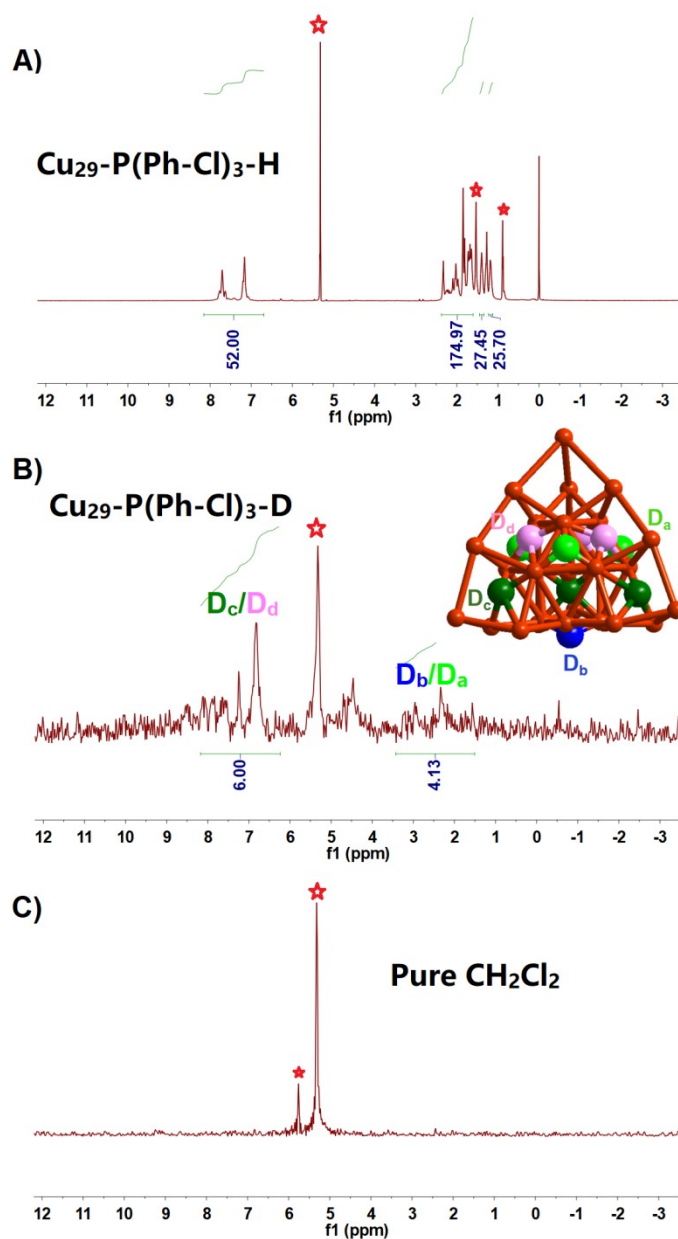

Figure S28. A) The  $^1\text{H}$ -NMR of  $\text{Cu}_{29}\text{-P(Ph-Cl)-H}$  dissolved in  $\text{CD}_2\text{Cl}_2$ . B) The  $^2\text{H}$ -NMR of  $\text{Cu}_{29}\text{-P(Ph-Cl)-D}$  dissolved in  $\text{CH}_2\text{Cl}_2$ . C) The  $^2\text{H}$ -NMR of pure  $\text{CH}_2\text{Cl}_2$ , which is for calibration. Asterisked peaks are solvent peaks (5.32 ppm for  $\text{CH}_2\text{Cl}_2$ , 0.89 and 1.27 ppm for n-hexane, which comes from the solvent in the crystal culture process). The inset in Figure S28B is optimized geometry of the  $\text{Cu}_{29}\text{-P(Ph-Cl)}$  obtained from DFT (ligands not shown); the four different D (or H) atoms, viz.,  $\text{D}_a$ ,  $\text{D}_b$ ,  $\text{D}_c$ , and  $\text{D}_d$  shown in pale green, blue, green and dark pink, respectively. Cu atoms, viz.,  $\text{D}_a$ ,  $\text{D}_b$ ,  $\text{D}_c$ , and  $\text{D}_d$  shown in pale green, blue, green and dark pink, respectively. Cu atoms are shown in brown. Three  $\text{D}_a$  (or  $\text{H}_a$  shown by the pale green sphere) cap the three Cu triangles on the top half of the core and one  $\text{D}_b$  (or  $\text{H}_b$  shown by the blue sphere) caps the downward-facing Cu triangle ( $\text{Cu}_3$ ) in the core. Three  $\text{D}_d$  (or  $\text{H}_d$ ) covering the three Cu quadrilateral ( $\text{Cu}_4$ ) on the top half of the core and three  $\text{D}_c$  (or  $\text{H}_c$ ) are encapsulated in trigonal prismatic (tp) cages.

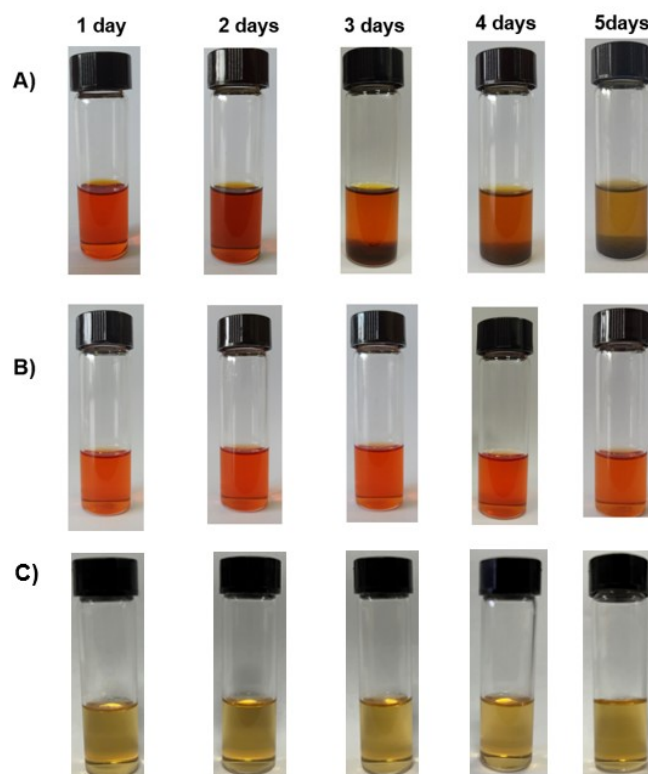

Figure S29. The stability of A)  $\text{Cu}_{28}\text{-PPh}_2\text{Py}$ , B)  $\text{Cu}_{29}\text{-P(Ph-Me)}_3$ , and C)  $\text{Cu}_{29}\text{-P(Ph-Cl)}_3$  in the  $\text{CH}_2\text{Cl}_2$  solution at room temperature.

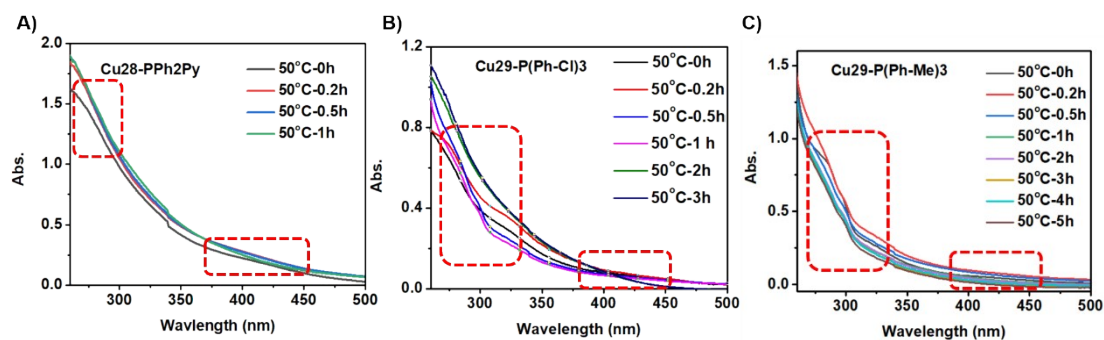

Figure S30. Time-dependent UV-vis spectra of A)  $\text{Cu}_{28}\text{-PPh}_2\text{Py}$ , B)  $\text{Cu}_{29}\text{-P(Ph-Cl)}_3$ , and C)  $\text{Cu}_{29}\text{-P(Ph-Me)}_3$  in the  $\text{CHCl}_3$  solution under a  $50^\circ\text{C}$  oil bath.

**Table S1. Crystal data and structure refinement for  $\text{Cu}_{28}\text{-PPh}_2\text{Py}$ .**

|                   |                                                                                     |
|-------------------|-------------------------------------------------------------------------------------|
| Empirical formula | $\text{C}_{159.5}\text{H}_{238.3}\text{ClCu}_{28}\text{N}_3\text{P}_3\text{S}_{18}$ |
| Formula weight    | 4682.38                                                                             |
| Temperature/K     | 150(2)                                                                              |
| Crystal system    | monoclinic                                                                          |
| Space group       | $\text{P2}_1/\text{a}$                                                              |

|                                             |                                                                        |
|---------------------------------------------|------------------------------------------------------------------------|
| a/Å                                         | 22.8639(13)                                                            |
| b/Å                                         | 32.229(2)                                                              |
| c/Å                                         | 26.6451(15)                                                            |
| $\alpha$ /°                                 | 90                                                                     |
| $\beta$ /°                                  | 90.576(5)                                                              |
| $\gamma$ /°                                 | 90                                                                     |
| Volume/Å <sup>3</sup>                       | 19633(2)                                                               |
| Z                                           | 4                                                                      |
| Radiation                                   | CuK $\alpha$ ( $\lambda$ = 1.54186)                                    |
| Index ranges                                | -14 $\leq$ h $\leq$ 26, -37 $\leq$ k $\leq$ 31, -30 $\leq$ l $\leq$ 30 |
| Reflections collected                       | 110149                                                                 |
| Independent reflections                     | 31015 [ $R_{\text{int}}$ = 0.0269, $R_{\text{sigma}}$ = 0.0322]        |
| Final R indexes [ $I \geq 2\sigma(I)$ ]     | $R_1$ = 0.0846, $wR_2$ = 0.2320                                        |
| Final R indexes [all data]                  | $R_1$ = 0.1018, $wR_2$ = 0.2434                                        |
| Largest diff. peak/hole / e Å <sup>-3</sup> | 4.39/-2.71                                                             |

**Table S2. Crystal data and structure refinement for Cu<sub>29</sub>-P(Ph-Cl)<sub>3</sub>.**

|                                             |                                                                                                                    |
|---------------------------------------------|--------------------------------------------------------------------------------------------------------------------|
| Empirical formula                           | C <sub>226</sub> H <sub>283</sub> Cl <sub>15</sub> Cu <sub>29</sub> F <sub>6</sub> OP <sub>5</sub> S <sub>15</sub> |
| Formula weight                              | 6139.67                                                                                                            |
| Temperature/K                               | 150(2)                                                                                                             |
| Crystal system                              | monoclinic                                                                                                         |
| Space group                                 | I2/a                                                                                                               |
| a/Å                                         | 36.1154(13)                                                                                                        |
| b/Å                                         | 34.7927(17)                                                                                                        |
| c/Å                                         | 50.324(2)                                                                                                          |
| $\alpha$ /°                                 | 90                                                                                                                 |
| $\beta$ /°                                  | 102.424(3)                                                                                                         |
| $\gamma$ /°                                 | 90                                                                                                                 |
| Volume/Å <sup>3</sup>                       | 61754(5)                                                                                                           |
| Z                                           | 8                                                                                                                  |
| Radiation                                   | CuK $\alpha$ ( $\lambda$ = 1.54186)                                                                                |
| Index ranges                                | -41 $\leq$ h $\leq$ 17, -40 $\leq$ k $\leq$ 40, -56 $\leq$ l $\leq$ 59                                             |
| Reflections collected                       | 193152                                                                                                             |
| Independent reflections                     | 52172 [ $R_{\text{int}}$ = 0.1402, $R_{\text{sigma}}$ = 0.0991]                                                    |
| Final R indexes [ $I \geq 2\sigma(I)$ ]     | $R_1$ = 0.1162, $wR_2$ = 0.3023                                                                                    |
| Final R indexes [all data]                  | $R_1$ = 0.1599, $wR_2$ = 0.3282                                                                                    |
| Largest diff. peak/hole / e Å <sup>-3</sup> | 1.70/-1.78                                                                                                         |

**Table S3. Crystal data and structure refinement for Cu<sub>29</sub>-Ph-PMe.**

|                                             |                                                                                                   |
|---------------------------------------------|---------------------------------------------------------------------------------------------------|
| Empirical formula                           | C <sub>192</sub> H <sub>282</sub> BCu <sub>29</sub> F <sub>4</sub> P <sub>4</sub> S <sub>18</sub> |
| Formula weight                              | 5220.59                                                                                           |
| Temperature/K                               | 150(2)                                                                                            |
| Crystal system                              | trigonal                                                                                          |
| Space group                                 | R-3                                                                                               |
| a/Å                                         | 21.191(2)                                                                                         |
| b/Å                                         | 21.191(2)                                                                                         |
| c/Å                                         | 90.410(6)                                                                                         |
| α /°                                        | 90                                                                                                |
| β /°                                        | 90                                                                                                |
| γ /°                                        | 120                                                                                               |
| Volume/Å <sup>3</sup>                       | 35160(7)                                                                                          |
| Z                                           | 6                                                                                                 |
| Radiation                                   | CuK α (λ = 1.54186)                                                                               |
| Index ranges                                | -21 ≤ h ≤ 23, -24 ≤ k ≤ 25, -75 ≤ l ≤ 109                                                         |
| Reflections collected                       | 34835                                                                                             |
| Independent reflections                     | 14265 [R <sub>int</sub> = 0.0046, R <sub>sigma</sub> = 0.0618]                                    |
| Final R indexes [I >= 2 σ (I)]              | R <sub>1</sub> = 0.0569, wR <sub>2</sub> = 0.1275                                                 |
| Final R indexes [all data]                  | R <sub>1</sub> = 0.0798, wR <sub>2</sub> = 0.1327                                                 |
| Largest diff. peak/hole / e Å <sup>-3</sup> | 1.05/-0.49                                                                                        |

**Table S4.** The average value of Cu-H and Cu-Cu bond length in cuboctahedron core. Cu-H<sup>ave</sup> represents the average value of Cu-H. The Cu-Cu<sup>ave</sup> represents the average value of Cu-Cu.

|                                                      | <b>Cu-H<sup>ave</sup></b> | <b>Cu-Cu<sup>ave</sup></b> |
|------------------------------------------------------|---------------------------|----------------------------|
| Cu <sub>25</sub>                                     | 1.835                     | 2.598                      |
| Cu <sub>29</sub> -P(Ph-Me) <sub>3</sub>              | /                         | 2.716                      |
| Cu <sub>29</sub> -P(Ph-Me) <sub>3</sub> <sup>T</sup> | 1.918                     | 2.635                      |
| Cu <sub>28</sub> -PPh <sub>2</sub> Py                | /                         | 2.605                      |
| Cu <sub>28</sub> -PPh <sub>2</sub> Py <sup>T</sup>   | 1.848                     | 2.641                      |
| Cu <sub>29</sub> -P(Ph-Cl) <sub>3</sub>              | /                         | 2.617                      |
| Cu <sub>29</sub> -P(Ph-Cl) <sub>3</sub> <sup>T</sup> | 1.928                     | 2.659                      |



**Table S5. The coordinate of the optimized geometry of Cu<sub>28</sub>-PPh<sub>2</sub>Py<sup>T</sup>**

|    |           |           |           |
|----|-----------|-----------|-----------|
| Cu | 6.718000  | 1.178000  | 6.680000  |
| Cu | 8.737000  | 2.183000  | 7.938000  |
| Cu | 5.709000  | -0.812000 | 8.079000  |
| Cu | 8.839000  | 2.082000  | 5.462000  |
| Cu | 5.116000  | 2.677000  | 5.217000  |
| Cu | 5.852000  | -0.933000 | 5.407000  |
| Cu | 6.740000  | 0.964000  | 4.032000  |
| Cu | 8.202000  | -0.448000 | 8.185000  |
| Cu | 4.944000  | 2.786000  | 7.832000  |
| Cu | 6.474000  | 1.187000  | 9.317000  |
| Cu | 8.333000  | -0.552000 | 5.424000  |
| Cu | 4.163000  | 0.823000  | 6.559000  |
| Cu | 7.253000  | 3.747000  | 6.562000  |
| Cu | 10.696000 | 0.470000  | 8.250000  |
| Cu | 10.752000 | 0.289000  | 5.241000  |
| Cu | 4.030000  | 1.867000  | 10.172000 |
| Cu | 6.286000  | 4.957000  | 4.400000  |
| Cu | 8.813000  | -2.734000 | 7.009000  |
| Cu | 3.407000  | -0.628000 | 4.487000  |
| Cu | 3.216000  | -0.378000 | 8.749000  |
| Cu | 8.068000  | 3.031000  | 10.320000 |
| Cu | 8.350000  | 2.937000  | 3.021000  |
| Cu | 4.431000  | 1.455000  | 2.827000  |
| Cu | 6.091000  | 5.009000  | 8.535000  |
| S  | 6.108000  | 2.180000  | 11.356000 |
| Cu | 5.804000  | 3.913000  | 1.147000  |
| Cu | 5.474000  | 4.511000  | 11.764000 |
| S  | 4.488000  | 3.821000  | 3.345000  |
| S  | 10.042000 | -1.715000 | 8.694000  |
| S  | 4.183000  | 4.131000  | 9.571000  |
| S  | 6.577000  | 1.759000  | 1.892000  |
| S  | 6.344000  | 5.870000  | 6.455000  |
| S  | 10.047000 | 2.075000  | 9.810000  |
| Cu | 6.069000  | -3.111000 | 6.926000  |
| S  | 12.357000 | 0.731000  | 6.758000  |
| S  | 10.246000 | 1.900000  | 3.657000  |
| S  | 2.555000  | 0.313000  | 10.776000 |
| S  | 7.334000  | 5.192000  | 10.426000 |
| S  | 10.160000 | -1.935000 | 5.260000  |
| P  | 5.133000  | 4.801000  | -0.790000 |
| S  | 4.241000  | -2.568000 | 8.413000  |

|   |           |           |           |
|---|-----------|-----------|-----------|
| S | 2.253000  | -0.459000 | 6.623000  |
| P | 4.856000  | 5.544000  | 13.639000 |
| S | 7.511000  | 4.991000  | 2.483000  |
| S | 2.535000  | 0.311000  | 2.654000  |
| S | 4.388000  | -2.682000 | 5.038000  |
| P | 1.082000  | -4.555000 | 6.641000  |
| C | 11.364000 | 4.274000  | 8.550000  |
| H | 10.371000 | 4.724000  | 8.379000  |
| H | 11.565000 | 3.603000  | 7.694000  |
| C | 9.563000  | 5.935000  | 0.835000  |
| H | 8.882000  | 5.748000  | -0.016000 |
| H | 10.086000 | 4.985000  | 1.036000  |
| C | 4.233000  | -3.478000 | 10.047000 |
| H | 4.609000  | -4.478000 | 9.776000  |
| C | 4.389000  | 7.124000  | 0.592000  |
| H | 5.003000  | 6.708000  | 1.398000  |
| C | 8.018000  | 7.673000  | 1.823000  |
| H | 7.292000  | 7.550000  | 0.997000  |
| H | 7.437000  | 7.953000  | 2.721000  |
| C | 5.028000  | 7.372000  | 13.527000 |
| C | 11.338000 | 3.439000  | 9.824000  |
| H | 11.023000 | 4.073000  | 10.672000 |
| C | 3.184000  | 5.327000  | 14.375000 |
| C | 12.451000 | 5.356000  | 8.621000  |
| H | 12.195000 | 6.085000  | 9.416000  |
| H | 12.470000 | 5.922000  | 7.671000  |
| C | 14.175000 | -1.038000 | 5.595000  |
| H | 14.817000 | -0.149000 | 5.437000  |
| H | 13.494000 | -1.101000 | 4.725000  |
| C | 4.062000  | 3.869000  | -1.956000 |
| C | 6.596000  | 5.237000  | -1.843000 |
| C | 9.874000  | 8.388000  | 0.247000  |
| H | 9.223000  | 8.322000  | -0.647000 |
| H | 10.622000 | 9.174000  | 0.035000  |
| C | 4.235000  | 6.400000  | -0.604000 |
| C | 13.793000 | 3.908000  | 10.196000 |
| H | 14.776000 | 3.433000  | 10.374000 |
| H | 13.605000 | 4.573000  | 11.064000 |
| C | 10.566000 | -4.241000 | 3.796000  |
| H | 11.635000 | -4.119000 | 4.064000  |
| H | 10.081000 | -4.781000 | 4.627000  |
| C | 1.952000  | 4.400000  | 2.363000  |
| H | 2.458000  | 4.992000  | 1.576000  |

|   |           |           |           |
|---|-----------|-----------|-----------|
| H | 1.923000  | 3.350000  | 2.024000  |
| C | 8.730000  | 6.338000  | 2.053000  |
| H | 9.390000  | 6.423000  | 2.935000  |
| C | 6.439000  | 0.918000  | 12.701000 |
| H | 6.381000  | -0.055000 | 12.183000 |
| C | 6.890000  | 6.540000  | -2.270000 |
| H | 6.237000  | 7.376000  | -2.005000 |
| C | 12.706000 | 2.823000  | 10.136000 |
| H | 12.664000 | 2.264000  | 11.090000 |
| H | 12.955000 | 2.095000  | 9.342000  |
| C | 2.766000  | 4.498000  | 3.655000  |
| H | 2.337000  | 3.821000  | 4.411000  |
| N | 7.369000  | 4.174000  | -2.144000 |
| C | 5.177000  | -2.833000 | 11.059000 |
| H | 6.195000  | -2.760000 | 10.638000 |
| H | 4.836000  | -1.798000 | 11.251000 |
| C | 8.570000  | 6.567000  | 10.670000 |
| H | 9.245000  | 6.502000  | 9.796000  |
| C | 8.033000  | 6.741000  | -3.052000 |
| H | 8.289000  | 7.746000  | -3.404000 |
| C | 13.826000 | 4.747000  | 8.914000  |
| H | 14.126000 | 4.104000  | 8.063000  |
| H | 14.589000 | 5.542000  | 8.996000  |
| C | 7.830000  | 1.100000  | 13.306000 |
| H | 8.600000  | 1.001000  | 12.520000 |
| H | 7.912000  | 2.125000  | 13.714000 |
| C | 3.073000  | 6.573000  | 8.744000  |
| H | 3.826000  | 6.619000  | 7.939000  |
| H | 3.548000  | 6.991000  | 9.652000  |
| C | 11.753000 | 3.013000  | 3.792000  |
| H | 12.419000 | 2.432000  | 4.454000  |
| C | 10.567000 | 7.039000  | 0.465000  |
| H | 11.314000 | 7.139000  | 1.276000  |
| H | 11.128000 | 6.739000  | -0.440000 |
| C | 9.024000  | 8.778000  | 1.460000  |
| H | 8.485000  | 9.724000  | 1.271000  |
| H | 9.688000  | 8.965000  | 2.327000  |
| C | 2.950000  | 8.878000  | -0.263000 |
| H | 2.447000  | 9.841000  | -0.129000 |
| C | 0.529000  | 4.945000  | 2.569000  |
| H | -0.019000 | 4.905000  | 1.609000  |
| H | -0.018000 | 4.287000  | 3.271000  |
| C | 2.813000  | -3.614000 | 10.595000 |

|   |           |           |           |
|---|-----------|-----------|-----------|
| H | 2.398000  | -2.605000 | 10.777000 |
| H | 2.168000  | -4.112000 | 9.850000  |
| C | 11.493000 | 4.374000  | 4.421000  |
| H | 10.755000 | 4.922000  | 3.806000  |
| H | 11.044000 | 4.247000  | 5.420000  |
| C | -0.214000 | -0.055000 | 10.609000 |
| H | -0.053000 | -0.620000 | 9.676000  |
| H | -0.072000 | -0.771000 | 11.442000 |
| C | 1.592000  | 5.003000  | 10.072000 |
| H | 1.995000  | 5.349000  | 11.044000 |
| H | 1.312000  | 3.946000  | 10.207000 |
| C | 3.773000  | -3.797000 | 12.939000 |
| H | 3.800000  | -4.415000 | 13.856000 |
| H | 3.385000  | -2.803000 | 13.239000 |
| C | 9.875000  | -2.040000 | 10.530000 |
| H | 9.153000  | -1.300000 | 10.918000 |
| C | 11.054000 | -4.279000 | 1.305000  |
| H | 10.915000 | -4.848000 | 0.368000  |
| H | 12.148000 | -4.184000 | 1.456000  |
| C | 13.353000 | -0.839000 | 6.872000  |
| H | 12.624000 | -1.661000 | 6.972000  |
| C | 2.803000  | 5.924000  | 4.207000  |
| H | 3.340000  | 6.573000  | 3.489000  |
| H | 3.369000  | 5.950000  | 5.155000  |
| C | 5.339000  | 1.005000  | 13.759000 |
| H | 5.342000  | 2.025000  | 14.191000 |
| H | 4.351000  | 0.846000  | 13.291000 |
| C | 9.368000  | 6.337000  | 11.957000 |
| H | 8.662000  | 6.289000  | 12.806000 |
| H | 9.872000  | 5.355000  | 11.915000 |
| C | 7.359000  | 0.576000  | 0.665000  |
| H | 7.753000  | -0.249000 | 1.286000  |
| C | 5.183000  | 10.167000 | 13.240000 |
| H | 5.241000  | 11.256000 | 13.136000 |
| C | 8.831000  | 5.645000  | -3.380000 |
| H | 9.730000  | 5.759000  | -3.993000 |
| C | -0.242000 | -0.107000 | 5.392000  |
| H | -0.356000 | -1.202000 | 5.474000  |
| H | 0.288000  | 0.090000  | 4.442000  |
| C | 0.841000  | 1.049000  | 10.727000 |
| H | 0.784000  | 1.705000  | 9.841000  |
| C | 3.753000  | 8.359000  | 0.758000  |
| H | 3.884000  | 8.915000  | 1.692000  |

|   |           |           |           |
|---|-----------|-----------|-----------|
| C | 5.774000  | -3.287000 | 2.669000  |
| H | 5.650000  | -2.226000 | 2.386000  |
| H | 6.689000  | -3.346000 | 3.286000  |
| C | 6.974000  | 0.141000  | 15.498000 |
| H | 7.144000  | -0.634000 | 16.269000 |
| H | 7.031000  | 1.119000  | 16.017000 |
| C | 1.590000  | -1.994000 | 1.396000  |
| H | 0.594000  | -1.509000 | 1.418000  |
| H | 1.703000  | -2.515000 | 2.363000  |
| C | 2.828000  | -4.418000 | 11.906000 |
| H | 3.145000  | -5.458000 | 11.691000 |
| H | 1.801000  | -4.483000 | 12.309000 |
| C | 5.895000  | 8.121000  | 14.338000 |
| H | 6.512000  | 7.624000  | 15.094000 |
| C | 5.187000  | -3.632000 | 12.371000 |
| H | 5.844000  | -3.130000 | 13.105000 |
| H | 5.632000  | -4.631000 | 12.188000 |
| C | 9.352000  | -3.452000 | 10.783000 |
| H | 10.022000 | -4.178000 | 10.283000 |
| H | 8.357000  | -3.570000 | 10.321000 |
| C | 2.688000  | 5.117000  | 9.014000  |
| H | 2.359000  | 4.637000  | 8.075000  |
| C | 8.065000  | 0.072000  | 14.425000 |
| H | 9.063000  | 0.234000  | 14.873000 |
| H | 8.083000  | -0.944000 | 13.987000 |
| C | 9.938000  | -2.852000 | 3.646000  |
| H | 8.851000  | -2.950000 | 3.494000  |
| C | 4.285000  | 3.832000  | -3.345000 |
| H | 5.171000  | 4.304000  | -3.777000 |
| C | 3.420000  | 6.926000  | -1.624000 |
| H | 3.272000  | 6.365000  | -2.552000 |
| C | 9.029000  | 6.793000  | 6.097000  |
| H | 8.921000  | 6.590000  | 5.017000  |
| H | 9.371000  | 5.853000  | 6.560000  |
| C | 0.756000  | 1.942000  | 6.504000  |
| H | 1.323000  | 2.209000  | 5.594000  |
| H | 1.355000  | 2.290000  | 7.365000  |
| C | 5.582000  | -0.020000 | 14.879000 |
| H | 4.797000  | 0.086000  | 15.651000 |
| H | 5.475000  | -1.042000 | 14.467000 |
| C | 8.455000  | 4.383000  | -2.901000 |
| H | 9.056000  | 3.494000  | -3.132000 |
| C | 1.374000  | 6.457000  | 4.409000  |



|   |           |           |           |
|---|-----------|-----------|-----------|
| H | 0.873000  | 5.863000  | 5.199000  |
| H | 1.416000  | 7.497000  | 4.780000  |
| C | 7.668000  | 7.184000  | 6.659000  |
| H | 7.744000  | 7.288000  | 7.754000  |
| C | 12.397000 | 3.132000  | 2.409000  |
| H | 11.694000 | 3.639000  | 1.722000  |
| H | 12.588000 | 2.127000  | 1.988000  |
| C | -0.620000 | 2.628000  | 6.478000  |
| H | -0.484000 | 3.723000  | 6.401000  |
| H | -1.138000 | 2.447000  | 7.441000  |
| C | 2.920000  | 3.241000  | -1.429000 |
| H | 2.745000  | 3.246000  | -0.347000 |
| C | 12.803000 | 5.174000  | 4.514000  |
| H | 12.601000 | 6.174000  | 4.942000  |
| H | 13.485000 | 4.666000  | 5.223000  |
| C | 10.448000 | -5.040000 | 2.488000  |
| H | 10.939000 | -6.023000 | 2.612000  |
| H | 9.379000  | -5.249000 | 2.286000  |
| C | 2.512000  | -0.184000 | -0.090000 |
| H | 3.291000  | 0.589000  | -0.191000 |
| H | 1.537000  | 0.343000  | -0.093000 |
| C | 14.245000 | -0.798000 | 8.117000  |
| H | 13.616000 | -0.695000 | 9.020000  |
| H | 14.892000 | 0.100000  | 8.069000  |
| C | 1.656000  | -2.985000 | 0.222000  |
| H | 0.866000  | -3.751000 | 0.329000  |
| H | 2.622000  | -3.529000 | 0.259000  |
| N | 7.277000  | 4.968000  | 14.667000 |
| H | 6.941000  | -0.487000 | 9.340000  |
| C | 8.498000  | 1.283000  | -0.070000 |
| H | 9.263000  | 1.615000  | 0.655000  |
| H | 8.094000  | 2.186000  | -0.564000 |
| C | 2.660000  | -0.909000 | 1.250000  |
| H | 3.659000  | -1.372000 | 1.307000  |
| C | 13.489000 | 5.305000  | 3.149000  |
| H | 12.861000 | 5.928000  | 2.484000  |
| H | 14.454000 | 5.834000  | 3.255000  |
| C | 9.295000  | -3.762000 | 12.287000 |
| H | 8.944000  | -4.800000 | 12.437000 |
| H | 8.542000  | -3.106000 | 12.767000 |
| C | 13.706000 | 3.934000  | 2.500000  |
| H | 14.440000 | 3.358000  | 3.098000  |
| H | 14.145000 | 4.048000  | 1.491000  |

|   |           |           |           |
|---|-----------|-----------|-----------|
| C | 5.988000  | 5.088000  | 15.038000 |
| C | 10.438000 | -2.882000 | 1.172000  |
| H | 9.368000  | -2.980000 | 0.897000  |
| H | 10.921000 | -2.321000 | 0.351000  |
| C | 10.552000 | -2.078000 | 2.478000  |
| H | 11.620000 | -1.885000 | 2.702000  |
| H | 10.066000 | -1.091000 | 2.376000  |
| C | 9.124000  | 0.356000  | -1.125000 |
| H | 9.917000  | 0.905000  | -1.668000 |
| H | 9.623000  | -0.494000 | -0.622000 |
| C | 7.158000  | 8.500000  | 6.067000  |
| H | 6.183000  | 8.769000  | 6.513000  |
| H | 6.987000  | 8.365000  | 4.982000  |
| C | 0.363000  | 5.843000  | 9.692000  |
| H | -0.394000 | 5.766000  | 10.495000 |
| H | -0.104000 | 5.417000  | 8.781000  |
| C | 15.118000 | -2.059000 | 8.209000  |
| H | 15.780000 | -1.992000 | 9.093000  |
| H | 14.465000 | -2.940000 | 8.372000  |
| C | 7.878000  | 7.934000  | 10.685000 |
| H | 7.319000  | 8.091000  | 9.746000  |
| H | 7.136000  | 7.951000  | 11.503000 |
| C | 11.241000 | -1.817000 | 11.187000 |
| H | 11.569000 | -0.775000 | 11.023000 |
| H | 11.986000 | -2.469000 | 10.691000 |
| C | 15.943000 | -2.269000 | 6.934000  |
| H | 16.531000 | -3.201000 | 7.006000  |
| H | 16.675000 | -1.442000 | 6.833000  |
| C | 8.184000  | 9.623000  | 6.297000  |
| H | 7.822000  | 10.560000 | 5.833000  |
| H | 8.264000  | 9.823000  | 7.384000  |
| C | -1.638000 | 0.524000  | 10.657000 |
| H | -1.809000 | 1.150000  | 9.758000  |
| H | -2.377000 | -0.295000 | 10.611000 |
| C | -1.869000 | 1.366000  | 11.915000 |
| H | -2.882000 | 1.809000  | 11.902000 |
| H | -1.825000 | 0.708000  | 12.806000 |
| C | 15.046000 | -2.298000 | 5.691000  |
| H | 15.657000 | -2.401000 | 4.775000  |
| H | 14.389000 | -3.190000 | 5.733000  |
| C | 2.782000  | 8.157000  | -1.452000 |
| H | 2.146000  | 8.552000  | -2.250000 |
| C | 2.224000  | 2.585000  | -3.657000 |

|    |           |           |           |
|----|-----------|-----------|-----------|
| H  | 1.505000  | 2.091000  | -4.320000 |
| C  | 2.001000  | 2.614000  | -2.275000 |
| H  | 1.111000  | 2.139000  | -1.849000 |
| C  | 2.503000  | 6.373000  | 15.027000 |
| H  | 2.934000  | 7.378000  | 15.050000 |
| C  | 0.600000  | 0.424000  | 6.553000  |
| H  | 0.126000  | 0.137000  | 7.509000  |
| C  | 0.714000  | 4.848000  | 15.626000 |
| H  | -0.249000 | 4.663000  | 16.114000 |
| C  | 8.071000  | -0.178000 | -2.102000 |
| H  | 8.536000  | -0.869000 | -2.829000 |
| H  | 7.654000  | 0.666000  | -2.686000 |
| C  | 8.905000  | 9.058000  | 10.894000 |
| H  | 8.385000  | 10.033000 | 10.929000 |
| H  | 9.588000  | 9.097000  | 10.021000 |
| C  | 1.838000  | 7.411000  | 8.376000  |
| H  | 2.139000  | 8.466000  | 8.229000  |
| H  | 1.439000  | 7.065000  | 7.403000  |
| C  | 11.192000 | -2.137000 | 12.689000 |
| H  | 12.201000 | -2.016000 | 13.125000 |
| H  | 10.542000 | -1.397000 | 13.198000 |
| C  | -1.618000 | 0.581000  | 5.378000  |
| H  | -2.204000 | 0.212000  | 4.516000  |
| H  | -2.183000 | 0.291000  | 6.286000  |
| C  | 0.611000  | 1.877000  | 11.996000 |
| H  | 1.365000  | 2.678000  | 12.064000 |
| H  | 0.772000  | 1.218000  | 12.873000 |
| C  | 3.371000  | 3.187000  | -4.186000 |
| H  | 3.556000  | 3.161000  | -5.265000 |
| C  | 10.658000 | -3.549000 | 12.954000 |
| H  | 10.588000 | -3.734000 | 14.041000 |
| H  | 11.378000 | -4.292000 | 12.555000 |
| C  | -1.763000 | -4.771000 | 6.599000  |
| H  | -1.647000 | -5.538000 | 5.827000  |
| C  | 0.740000  | 7.305000  | 9.438000  |
| H  | -0.150000 | 7.884000  | 9.129000  |
| H  | 1.095000  | 7.759000  | 10.385000 |
| N  | 0.323000  | -4.548000 | 4.071000  |
| H  | 7.155000  | -0.724000 | 4.205000  |
| Cu | 2.608000  | -2.914000 | 6.616000  |
| C  | 2.570000  | -1.165000 | -1.271000 |
| H  | 2.430000  | -0.614000 | -2.219000 |
| H  | 3.580000  | -1.617000 | -1.318000 |

|   |           |           |           |
|---|-----------|-----------|-----------|
| H | 6.295000  | -6.962000 | 10.739000 |
| C | 7.456000  | -8.299000 | 9.459000  |
| H | 6.541000  | -8.695000 | 8.974000  |
| C | 4.588000  | -3.744000 | 3.514000  |
| H | 3.650000  | -3.590000 | 2.953000  |
| C | -0.809000 | 2.462000  | 12.044000 |
| H | -0.947000 | 3.033000  | 12.981000 |
| H | -0.933000 | 3.191000  | 11.218000 |
| C | 10.052000 | 7.916000  | 6.324000  |
| H | 10.235000 | 8.028000  | 7.410000  |
| H | 11.020000 | 7.627000  | 5.875000  |
| C | 1.384000  | 3.805000  | 14.978000 |
| H | 0.950000  | 2.801000  | 14.958000 |
| C | 8.586000  | -8.232000 | 8.426000  |
| H | 9.129000  | -7.146000 | 6.609000  |
| C | 4.245000  | 8.039000  | 12.565000 |
| H | 3.571000  | 7.464000  | 11.922000 |
| C | 0.550000  | 6.376000  | 3.119000  |
| H | -0.480000 | 6.735000  | 3.298000  |
| H | 0.994000  | 7.051000  | 2.360000  |
| C | 5.971000  | 9.511000  | 14.191000 |
| H | 6.647000  | 10.086000 | 14.833000 |
| H | 8.758000  | -9.227000 | 7.975000  |
| H | 6.728000  | -4.880000 | 9.381000  |
| H | 7.402000  | -7.528000 | 6.737000  |
| C | 4.860000  | -6.100000 | 2.665000  |
| H | 4.984000  | -7.156000 | 2.973000  |
| H | 3.928000  | -6.056000 | 2.066000  |
| C | 4.708000  | -5.216000 | 3.913000  |
| H | 3.819000  | -5.522000 | 4.493000  |
| H | 5.587000  | -5.339000 | 4.571000  |
| C | 9.567000  | 9.250000  | 5.748000  |
| H | 10.294000 | 10.053000 | 5.968000  |
| H | 9.510000  | 9.173000  | 4.645000  |
| C | 5.549000  | 4.883000  | 16.355000 |
| H | 4.493000  | 4.998000  | 16.617000 |
| H | 9.530000  | -7.952000 | 8.935000  |
| H | 7.712000  | -9.011000 | 10.265000 |
| H | 5.942000  | -6.140000 | 8.417000  |
| C | -0.813000 | -3.141000 | 8.121000  |
| H | 0.060000  | -2.631000 | 8.541000  |
| C | 1.270000  | 6.132000  | 15.640000 |
| H | 0.743000  | 6.953000  | 16.138000 |

|   |           |           |           |
|---|-----------|-----------|-----------|
| C | 6.301000  | 0.046000  | -0.300000 |
| H | 5.817000  | 0.903000  | -0.806000 |
| H | 5.514000  | -0.485000 | 0.261000  |
| C | 6.935000  | -0.880000 | -1.352000 |
| H | 7.326000  | -1.789000 | -0.854000 |
| H | 6.154000  | -1.220000 | -2.056000 |
| C | 1.525000  | -2.276000 | -1.130000 |
| H | 1.623000  | -3.005000 | -1.957000 |
| H | 0.510000  | -1.839000 | -1.214000 |
| C | 8.173000  | 4.645000  | 15.610000 |
| H | 9.215000  | 4.565000  | 15.272000 |
| C | 10.393000 | 7.460000  | 12.174000 |
| H | 10.932000 | 7.292000  | 13.125000 |
| H | 11.156000 | 7.421000  | 11.371000 |
| C | 7.836000  | 4.413000  | 16.949000 |
| H | 8.608000  | 4.141000  | 17.675000 |
| C | 9.725000  | 8.840000  | 12.172000 |
| H | 10.484000 | 9.636000  | 12.282000 |
| H | 9.052000  | 8.919000  | 13.049000 |
| C | 2.608000  | 4.044000  | 14.346000 |
| H | 3.123000  | 3.229000  | 13.826000 |
| C | 4.315000  | 9.426000  | 12.429000 |
| H | 3.690000  | 9.932000  | 11.684000 |
| C | 5.931000  | -4.173000 | 1.423000  |
| H | 5.057000  | -4.026000 | 0.758000  |
| H | 6.818000  | -3.848000 | 0.848000  |
| C | 6.044000  | -5.655000 | 1.799000  |
| H | 6.108000  | -6.278000 | 0.888000  |
| H | 6.986000  | -5.815000 | 2.359000  |
| C | -1.487000 | 2.107000  | 5.326000  |
| H | -2.486000 | 2.582000  | 5.352000  |
| H | -1.024000 | 2.402000  | 4.364000  |
| C | -3.047000 | -4.436000 | 7.043000  |
| H | -3.917000 | -4.941000 | 6.612000  |
| C | -2.098000 | -2.817000 | 8.570000  |
| H | -2.225000 | -2.054000 | 9.343000  |
| C | 1.522000  | -5.955000 | 7.754000  |
| C | 0.575000  | -6.604000 | 8.567000  |
| H | -0.465000 | -6.264000 | 8.574000  |
| C | 0.954000  | -7.684000 | 9.370000  |
| H | 0.205000  | -8.175000 | 10.001000 |
| C | 2.276000  | -8.138000 | 9.364000  |
| H | 2.571000  | -8.988000 | 9.989000  |

|   |           |           |           |
|---|-----------|-----------|-----------|
| C | 3.224000  | -7.496000 | 8.558000  |
| H | 4.262000  | -7.842000 | 8.554000  |
| C | 2.857000  | -6.404000 | 7.768000  |
| H | 3.613000  | -5.891000 | 7.160000  |
| C | 6.496000  | 4.534000  | 17.325000 |
| H | 6.189000  | 4.366000  | 18.364000 |
| C | 1.002000  | -6.758000 | 4.779000  |
| H | 1.374000  | -7.411000 | 5.574000  |
| C | 0.701000  | -7.270000 | 3.511000  |
| H | 0.851000  | -8.334000 | 3.295000  |
| C | 0.793000  | -5.391000 | 5.010000  |
| C | -0.635000 | -4.124000 | 7.134000  |
| C | 0.191000  | -6.410000 | 2.539000  |
| H | -0.073000 | -6.769000 | 1.540000  |
| C | 0.016000  | -5.060000 | 2.873000  |
| H | -0.389000 | -4.352000 | 2.141000  |
| C | -3.217000 | -3.461000 | 8.030000  |
| H | -4.222000 | -3.200000 | 8.376000  |
| C | 7.158000  | -6.915000 | 10.047000 |
| S | 7.679000  | -4.622000 | 6.532000  |
| H | 8.023000  | -6.578000 | 10.652000 |
| C | 8.010000  | -5.822000 | 7.922000  |
| C | 8.287000  | -7.205000 | 7.322000  |
| C | 6.879000  | -5.881000 | 8.945000  |
| H | 8.928000  | -5.461000 | 8.417000  |
| H | 8.928000  | 3.365000  | 6.647000  |
| H | 6.815000  | -1.446000 | 6.813000  |
| H | 8.447000  | 0.691000  | 6.789000  |
| H | 4.925000  | 0.914000  | 8.292000  |
| H | 5.095000  | 0.714000  | 4.973000  |
| H | 3.908000  | 2.615000  | 6.459000  |

**Table S6. The coordinate of the optimized geometry of  $\text{Cu}_{29}\text{-P(Ph-Me)}_3^{\text{T}}$**

|   |           |           |           |
|---|-----------|-----------|-----------|
| P | -6.548000 | 15.946000 | 40.726000 |
| S | -1.810000 | 11.251000 | 33.289000 |
| S | -3.742000 | 14.971000 | 34.478000 |
| S | -4.692000 | 13.043000 | 38.356000 |
| S | -2.855000 | 14.173000 | 40.992000 |
| S | -4.002000 | 10.204000 | 41.475000 |
| S | -1.953000 | 7.856000  | 38.389000 |
| C | 3.228000  | 10.442000 | 32.646000 |
| H | 2.875000  | 9.503000  | 32.186000 |

|   |           |           |           |
|---|-----------|-----------|-----------|
| C | 4.192000  | 10.125000 | 33.786000 |
| H | 3.693000  | 9.482000  | 34.529000 |
| H | 4.455000  | 11.067000 | 34.300000 |
| C | 5.469000  | 9.456000  | 33.252000 |
| H | 6.166000  | 9.274000  | 34.092000 |
| H | 5.217000  | 8.461000  | 32.833000 |
| C | 6.139000  | 10.312000 | 32.171000 |
| H | 6.487000  | 11.260000 | 32.628000 |
| H | 7.036000  | 9.801000  | 31.773000 |
| C | 5.158000  | 10.631000 | 31.037000 |
| H | 4.881000  | 9.694000  | 30.513000 |
| H | 5.634000  | 11.283000 | 30.281000 |
| C | 3.880000  | 11.308000 | 31.566000 |
| H | 4.132000  | 12.292000 | 32.004000 |
| H | 3.170000  | 11.478000 | 30.738000 |
| C | 0.445000  | 6.385000  | 33.449000 |
| H | -0.050000 | 6.360000  | 32.457000 |
| C | 1.909000  | 6.772000  | 33.247000 |
| H | 2.381000  | 6.904000  | 34.239000 |
| H | 1.957000  | 7.752000  | 32.744000 |
| C | 2.667000  | 5.708000  | 32.439000 |
| H | 2.259000  | 5.675000  | 31.408000 |
| H | 3.731000  | 5.999000  | 32.344000 |
| C | 2.540000  | 4.320000  | 33.074000 |
| H | 3.056000  | 4.322000  | 34.055000 |
| H | 3.052000  | 3.563000  | 32.450000 |
| C | 1.069000  | 3.935000  | 33.279000 |
| H | 0.998000  | 2.955000  | 33.790000 |
| H | 0.584000  | 3.807000  | 32.290000 |
| C | 0.310000  | 4.999000  | 34.088000 |
| H | -0.759000 | 4.728000  | 34.176000 |
| H | 0.711000  | 5.042000  | 35.118000 |
| C | 3.197000  | 7.050000  | 37.990000 |
| H | 3.592000  | 6.923000  | 39.014000 |
| C | 3.033000  | 5.682000  | 37.332000 |
| H | 2.373000  | 5.044000  | 37.938000 |
| H | 2.536000  | 5.821000  | 36.354000 |
| C | 4.396000  | 5.003000  | 37.127000 |
| H | 4.247000  | 4.032000  | 36.619000 |
| H | 4.841000  | 4.772000  | 38.116000 |
| C | 5.356000  | 5.892000  | 36.331000 |
| H | 6.345000  | 5.407000  | 36.236000 |
| H | 4.967000  | 6.018000  | 35.301000 |

|   |           |           |           |
|---|-----------|-----------|-----------|
| C | 5.500000  | 7.271000  | 36.983000 |
| H | 6.145000  | 7.923000  | 36.368000 |
| H | 6.010000  | 7.162000  | 37.962000 |
| C | 4.137000  | 7.948000  | 37.193000 |
| H | 4.253000  | 8.921000  | 37.699000 |
| H | 3.675000  | 8.160000  | 36.212000 |
| C | -0.570000 | 9.175000  | 42.860000 |
| H | -1.238000 | 10.053000 | 42.884000 |
| C | -1.309000 | 7.976000  | 43.459000 |
| H | -0.696000 | 7.066000  | 43.322000 |
| H | -2.258000 | 7.822000  | 42.917000 |
| C | -1.580000 | 8.194000  | 44.956000 |
| H | -2.295000 | 9.033000  | 45.075000 |
| H | -2.071000 | 7.298000  | 45.378000 |
| C | -0.291000 | 8.511000  | 45.724000 |
| H | 0.376000  | 7.625000  | 45.694000 |
| H | -0.517000 | 8.701000  | 46.791000 |
| C | 0.439000  | 9.710000  | 45.108000 |
| H | 1.392000  | 9.901000  | 45.637000 |
| H | -0.179000 | 10.620000 | 45.238000 |
| C | 0.719000  | 9.493000  | 43.612000 |
| H | 1.201000  | 10.382000 | 43.173000 |
| H | 1.434000  | 8.660000  | 43.483000 |
| C | 5.217000  | 8.814000  | 41.107000 |
| H | 5.355000  | 8.679000  | 40.021000 |
| C | 5.007000  | 7.444000  | 41.759000 |
| H | 4.130000  | 6.945000  | 41.311000 |
| H | 4.769000  | 7.599000  | 42.831000 |
| C | 6.255000  | 6.558000  | 41.630000 |
| H | 6.426000  | 6.321000  | 40.561000 |
| H | 6.083000  | 5.590000  | 42.138000 |
| C | 7.499000  | 7.250000  | 42.202000 |
| H | 7.378000  | 7.367000  | 43.297000 |
| H | 8.394000  | 6.616000  | 42.052000 |
| C | 7.707000  | 8.629000  | 41.566000 |
| H | 7.958000  | 8.503000  | 40.494000 |
| H | 8.572000  | 9.139000  | 42.032000 |
| C | 6.453000  | 9.505000  | 41.694000 |
| H | 6.256000  | 9.724000  | 42.762000 |
| H | 6.603000  | 10.476000 | 41.194000 |
| C | 6.110000  | 11.985000 | 37.319000 |
| H | 5.649000  | 11.516000 | 36.433000 |
| C | 7.119000  | 13.046000 | 36.874000 |



|   |           |           |           |
|---|-----------|-----------|-----------|
| H | 7.495000  | 13.559000 | 37.779000 |
| H | 6.619000  | 13.797000 | 36.238000 |
| C | 8.303000  | 12.407000 | 36.130000 |
| H | 9.028000  | 13.191000 | 35.841000 |
| H | 7.939000  | 11.953000 | 35.185000 |
| C | 8.988000  | 11.331000 | 36.982000 |
| H | 9.452000  | 11.808000 | 37.868000 |
| H | 9.806000  | 10.849000 | 36.415000 |
| C | 7.975000  | 10.280000 | 37.448000 |
| H | 8.457000  | 9.535000  | 38.109000 |
| H | 7.601000  | 9.720000  | 36.569000 |
| C | 6.787000  | 10.921000 | 38.181000 |
| H | 6.051000  | 10.156000 | 38.477000 |
| H | 7.143000  | 11.396000 | 39.114000 |
| C | 0.937000  | 10.858000 | 28.952000 |
| C | 1.775000  | 11.045000 | 27.840000 |
| H | 1.818000  | 12.022000 | 27.345000 |
| C | 2.567000  | 9.995000  | 27.366000 |
| H | 3.218000  | 10.163000 | 26.499000 |
| C | 2.553000  | 8.733000  | 27.983000 |
| C | 1.704000  | 8.552000  | 29.088000 |
| H | 1.674000  | 7.576000  | 29.589000 |
| C | 0.914000  | 9.597000  | 29.575000 |
| H | 0.286000  | 9.437000  | 30.458000 |
| C | 3.447000  | 7.624000  | 27.498000 |
| H | -1.977000 | 11.193000 | 39.240000 |
| H | 0.261000  | 14.290000 | 39.125000 |
| H | 1.686000  | 11.051000 | 39.379000 |
| H | 3.080000  | 6.637000  | 27.823000 |
| H | 4.471000  | 7.743000  | 27.898000 |
| H | 3.526000  | 7.618000  | 26.398000 |
| C | 0.697000  | 3.499000  | 39.365000 |
| C | 1.897000  | 2.876000  | 39.741000 |
| H | 2.327000  | 3.066000  | 40.731000 |
| C | 2.558000  | 2.012000  | 38.858000 |
| H | 3.497000  | 1.541000  | 39.176000 |
| C | 2.048000  | 1.735000  | 37.583000 |
| C | 0.840000  | 2.357000  | 37.215000 |
| H | 0.414000  | 2.166000  | 36.222000 |
| C | 0.182000  | 3.231000  | 38.080000 |
| H | -0.743000 | 3.715000  | 37.751000 |
| H | 3.088000  | 1.358000  | 35.723000 |
| C | -7.333000 | 15.058000 | 42.126000 |

|    |            |           |           |
|----|------------|-----------|-----------|
| C  | -8.619000  | 15.369000 | 42.611000 |
| H  | -9.230000  | 16.126000 | 42.106000 |
| C  | -5.756000  | 2.399000  | 41.585000 |
| H  | -6.403000  | 2.489000  | 40.692000 |
| H  | -5.724000  | 1.331000  | 41.858000 |
| C  | -1.807000  | 3.994000  | 40.718000 |
| C  | -2.087000  | 2.629000  | 40.525000 |
| H  | -1.313000  | 1.957000  | 40.142000 |
| C  | -3.358000  | 2.121000  | 40.813000 |
| H  | -3.558000  | 1.054000  | 40.655000 |
| C  | -4.382000  | 2.945000  | 41.307000 |
| C  | -4.092000  | 4.307000  | 41.499000 |
| H  | -4.872000  | 4.976000  | 41.880000 |
| C  | -2.831000  | 4.828000  | 41.202000 |
| H  | -2.637000  | 5.897000  | 41.340000 |
| H  | -6.251000  | 2.948000  | 42.402000 |
| C  | -9.129000  | 14.710000 | 43.733000 |
| H  | -10.130000 | 14.967000 | 44.097000 |
| C  | -8.383000  | 13.725000 | 44.403000 |
| C  | 2.817000   | 4.257000  | 45.824000 |
| H  | 2.995000   | 5.246000  | 46.279000 |
| H  | 2.273000   | 3.634000  | 46.553000 |
| C  | 0.690000   | 4.572000  | 42.050000 |
| C  | 0.471000   | 3.478000  | 42.907000 |
| H  | -0.246000  | 2.699000  | 42.629000 |
| C  | 1.153000   | 3.384000  | 44.123000 |
| H  | 0.965000   | 2.527000  | 44.780000 |
| C  | 2.066000   | 4.374000  | 44.525000 |
| C  | 2.272000   | 5.467000  | 43.667000 |
| H  | 2.965000   | 6.262000  | 43.963000 |
| C  | 1.592000   | 5.572000  | 42.450000 |
| H  | 1.750000   | 6.448000  | 41.812000 |
| H  | 3.806000   | 3.787000  | 45.665000 |
| C  | -7.110000  | 13.410000 | 43.905000 |
| H  | -6.510000  | 12.635000 | 44.395000 |
| C  | -6.596000  | 14.057000 | 42.777000 |
| C  | -5.074000  | 21.629000 | 42.691000 |
| H  | -5.504000  | 22.384000 | 42.006000 |
| H  | -5.449000  | 21.850000 | 43.704000 |
| Cu | -0.062000  | 12.271000 | 37.578000 |
| Cu | 1.277000   | 11.205000 | 35.532000 |
| Cu | 2.617000   | 12.376000 | 37.308000 |
| Cu | -0.254000  | 10.873000 | 39.835000 |

|    |           |           |           |
|----|-----------|-----------|-----------|
| Cu | -0.091000 | 12.182000 | 31.902000 |
| Cu | -0.033000 | 9.759000  | 33.895000 |
| Cu | 0.321000  | 8.322000  | 36.344000 |
| Cu | 1.388000  | 10.212000 | 37.822000 |
| Cu | 3.533000  | 11.535000 | 39.816000 |
| Cu | 1.890000  | 9.360000  | 40.190000 |
| Cu | -0.196000 | 6.800000  | 39.584000 |
| P  | -0.080000 | 12.201000 | 29.686000 |
| P  | -0.152000 | 4.742000  | 40.423000 |
| S  | 1.660000  | 11.257000 | 33.273000 |
| S  | -0.558000 | 7.636000  | 34.391000 |
| S  | 1.535000  | 7.861000  | 38.267000 |
| S  | -0.278000 | 8.883000  | 41.032000 |
| S  | 3.730000  | 9.894000  | 41.376000 |
| S  | 4.685000  | 12.786000 | 38.228000 |
| C  | 0.621000  | 13.740000 | 28.968000 |
| C  | 0.102000  | 14.376000 | 27.826000 |
| H  | -0.769000 | 13.953000 | 27.316000 |
| C  | 0.687000  | 15.549000 | 27.341000 |
| H  | 0.263000  | 16.031000 | 26.452000 |
| C  | 1.802000  | 16.124000 | 27.974000 |
| C  | 2.315000  | 15.483000 | 29.113000 |
| H  | 3.180000  | 15.914000 | 29.629000 |
| C  | 1.733000  | 14.315000 | 29.611000 |
| H  | 2.137000  | 13.849000 | 30.517000 |
| H  | 2.560000  | 17.365000 | 26.367000 |
| H  | -0.017000 | 12.312000 | 40.812000 |
| H  | 2.567000  | 10.779000 | 36.642000 |
| H  | -2.646000 | 10.724000 | 36.635000 |
| H  | -0.003000 | 10.182000 | 36.465000 |
| H  | -1.403000 | 13.014000 | 36.537000 |
| H  | 1.910000  | 13.622000 | 36.213000 |
| C  | -1.729000 | 12.023000 | 28.898000 |
| C  | -1.938000 | 11.300000 | 27.711000 |
| H  | -1.092000 | 10.821000 | 27.207000 |
| C  | -3.225000 | 11.163000 | 27.183000 |
| H  | -3.370000 | 10.586000 | 26.262000 |
| C  | -4.338000 | 11.742000 | 27.814000 |
| C  | -4.121000 | 12.464000 | 29.000000 |
| H  | -4.975000 | 12.916000 | 29.519000 |
| C  | -2.840000 | 12.601000 | 29.539000 |
| H  | -2.699000 | 13.143000 | 30.481000 |
| H  | -6.500000 | 11.795000 | 27.976000 |

|   |            |           |           |
|---|------------|-----------|-----------|
| C | -10.944000 | 16.752000 | 36.456000 |
| H | -11.350000 | 17.777000 | 36.422000 |
| H | -10.488000 | 16.552000 | 35.467000 |
| C | 2.761000   | 0.815000  | 36.629000 |
| H | 3.653000   | 0.363000  | 37.092000 |
| H | 2.102000   | -0.005000 | 36.291000 |
| C | -0.061000  | 15.886000 | 32.635000 |
| H | 0.888000   | 16.015000 | 32.086000 |
| C | -0.138000  | 16.911000 | 33.762000 |
| H | 0.716000   | 16.783000 | 34.447000 |
| H | -1.051000  | 16.720000 | 34.353000 |
| C | -0.176000  | 18.339000 | 33.194000 |
| H | -0.269000  | 19.063000 | 34.025000 |
| H | 0.786000   | 18.560000 | 32.691000 |
| C | -1.328000  | 18.513000 | 32.198000 |
| H | -2.290000  | 18.405000 | 32.738000 |
| H | -1.318000  | 19.532000 | 31.767000 |
| C | -1.257000  | 17.464000 | 31.082000 |
| H | -0.349000  | 17.635000 | 30.470000 |
| H | -2.119000  | 17.568000 | 30.396000 |
| C | -1.221000  | 16.034000 | 31.648000 |
| H | -2.166000  | 15.815000 | 32.177000 |
| H | -1.115000  | 15.301000 | 30.829000 |
| C | 4.809000   | 15.580000 | 33.320000 |
| H | 4.974000   | 15.147000 | 32.313000 |
| C | 3.737000   | 16.661000 | 33.216000 |
| H | 3.480000   | 17.002000 | 34.236000 |
| H | 2.818000   | 16.223000 | 32.794000 |
| C | 4.208000   | 17.854000 | 32.370000 |
| H | 4.342000   | 17.529000 | 31.318000 |
| H | 3.424000   | 18.634000 | 32.357000 |
| C | 5.530000   | 18.429000 | 32.892000 |
| H | 5.363000   | 18.865000 | 33.897000 |
| H | 5.872000   | 19.257000 | 32.243000 |
| C | 6.607000   | 17.342000 | 32.984000 |
| H | 7.539000   | 17.760000 | 33.413000 |
| H | 6.862000   | 16.993000 | 31.964000 |
| C | 6.137000   | 16.150000 | 33.831000 |
| H | 6.904000   | 15.354000 | 33.842000 |
| H | 5.998000   | 16.469000 | 34.882000 |
| C | 3.098000   | 17.768000 | 37.922000 |
| H | 3.080000   | 18.203000 | 38.938000 |
| C | 4.368000   | 18.214000 | 37.201000 |

|   |           |           |           |
|---|-----------|-----------|-----------|
| H | 5.259000  | 17.921000 | 37.775000 |
| H | 4.424000  | 17.683000 | 36.232000 |
| C | 4.364000  | 19.734000 | 36.961000 |
| H | 5.271000  | 20.016000 | 36.396000 |
| H | 4.431000  | 20.256000 | 37.937000 |
| C | 3.102000  | 20.192000 | 36.222000 |
| H | 3.096000  | 21.294000 | 36.114000 |
| H | 3.109000  | 19.775000 | 35.195000 |
| C | 1.835000  | 19.719000 | 36.944000 |
| H | 0.933000  | 20.004000 | 36.373000 |
| H | 1.759000  | 20.230000 | 37.925000 |
| C | 1.847000  | 18.198000 | 37.164000 |
| H | 0.946000  | 17.865000 | 37.705000 |
| H | 1.832000  | 17.681000 | 36.186000 |
| C | 2.899000  | 13.358000 | 42.705000 |
| H | 2.443000  | 12.354000 | 42.709000 |
| C | 4.306000  | 13.266000 | 43.297000 |
| H | 4.810000  | 14.246000 | 43.190000 |
| H | 4.893000  | 12.523000 | 42.731000 |
| C | 4.245000  | 12.874000 | 44.782000 |
| H | 3.847000  | 11.843000 | 44.865000 |
| H | 5.268000  | 12.852000 | 45.202000 |
| C | 3.358000  | 13.833000 | 45.584000 |
| H | 3.822000  | 14.839000 | 45.588000 |
| H | 3.297000  | 13.507000 | 46.639000 |
| C | 1.957000  | 13.928000 | 44.971000 |
| H | 1.335000  | 14.658000 | 45.525000 |
| H | 1.448000  | 12.948000 | 45.068000 |
| C | 2.014000  | 14.326000 | 43.487000 |
| H | 1.002000  | 14.347000 | 43.051000 |
| H | 2.416000  | 15.351000 | 43.390000 |
| C | 0.266000  | 18.581000 | 40.938000 |
| H | 0.294000  | 18.765000 | 39.850000 |
| C | 1.559000  | 19.102000 | 41.573000 |
| H | 2.432000  | 18.614000 | 41.106000 |
| H | 1.565000  | 18.807000 | 42.641000 |
| C | 1.673000  | 20.629000 | 41.456000 |
| H | 1.774000  | 20.906000 | 40.387000 |
| H | 2.599000  | 20.974000 | 41.955000 |
| C | 0.448000  | 21.336000 | 42.048000 |
| H | 0.416000  | 21.157000 | 43.142000 |
| H | 0.529000  | 22.431000 | 41.911000 |
| C | -0.847000 | 20.812000 | 41.418000 |

|   |           |           |           |
|---|-----------|-----------|-----------|
| H | -0.873000 | 21.097000 | 40.346000 |
| H | -1.727000 | 21.287000 | 41.890000 |
| C | -0.952000 | 19.286000 | 41.543000 |
| H | -1.023000 | 19.004000 | 42.612000 |
| H | -1.871000 | 18.910000 | 41.063000 |
| C | -2.969000 | 17.556000 | 37.102000 |
| H | -2.451000 | 17.226000 | 36.187000 |
| C | -4.393000 | 17.984000 | 36.737000 |
| H | -4.950000 | 18.230000 | 37.661000 |
| H | -4.920000 | 17.148000 | 36.251000 |
| C | -4.362000 | 19.212000 | 35.814000 |
| H | -5.396000 | 19.523000 | 35.573000 |
| H | -3.888000 | 18.926000 | 34.854000 |
| C | -3.583000 | 20.371000 | 36.445000 |
| H | -4.122000 | 20.722000 | 37.349000 |
| H | -3.540000 | 21.233000 | 35.752000 |
| C | -2.168000 | 19.934000 | 36.842000 |
| H | -1.632000 | 20.759000 | 37.348000 |
| H | -1.588000 | 19.700000 | 35.928000 |
| C | -2.191000 | 18.697000 | 37.753000 |
| H | -1.168000 | 18.365000 | 37.992000 |
| H | -2.669000 | 18.960000 | 38.715000 |
| C | 7.310000  | 17.120000 | 39.255000 |
| C | 7.425000  | 18.462000 | 39.651000 |
| H | 7.129000  | 18.762000 | 40.661000 |
| C | 7.906000  | 19.428000 | 38.759000 |
| H | 7.971000  | 20.472000 | 39.089000 |
| C | 8.299000  | 19.091000 | 37.456000 |
| C | 8.183000  | 17.745000 | 37.068000 |
| H | 8.462000  | 17.451000 | 36.049000 |
| C | 7.690000  | 16.777000 | 37.943000 |
| H | 7.580000  | 15.747000 | 37.594000 |
| C | 8.832000  | 20.126000 | 36.502000 |
| C | 2.403000  | 17.404000 | 27.459000 |
| H | 1.738000  | 18.264000 | 27.659000 |
| H | 3.374000  | 17.616000 | 27.935000 |
| H | 8.570000  | 19.882000 | 35.458000 |
| H | 9.935000  | 20.188000 | 36.557000 |
| H | 8.436000  | 21.130000 | 36.729000 |
| C | 8.087000  | 14.752000 | 40.702000 |
| C | 9.404000  | 15.139000 | 40.402000 |
| H | 9.596000  | 16.100000 | 39.913000 |
| C | 10.477000 | 14.304000 | 40.727000 |

|    |           |           |           |
|----|-----------|-----------|-----------|
| H  | 11.498000 | 14.623000 | 40.485000 |
| C  | 10.277000 | 13.069000 | 41.363000 |
| C  | 8.957000  | 12.692000 | 41.663000 |
| H  | 8.771000  | 11.734000 | 42.161000 |
| C  | 7.877000  | 13.510000 | 41.327000 |
| H  | 6.857000  | 13.185000 | 41.556000 |
| C  | 11.435000 | 12.166000 | 41.689000 |
| Cu | -2.186000 | 13.437000 | 34.017000 |
| Cu | -3.834000 | 14.243000 | 36.587000 |
| Cu | -2.634000 | 12.113000 | 37.724000 |
| H  | 11.230000 | 11.548000 | 42.579000 |
| H  | 12.358000 | 12.740000 | 41.873000 |
| H  | 11.642000 | 11.473000 | 40.852000 |
| C  | 6.325000  | 16.677000 | 41.936000 |
| C  | 7.362000  | 16.977000 | 42.839000 |
| H  | 8.386000  | 16.654000 | 42.621000 |
| C  | 7.095000  | 17.678000 | 44.016000 |
| H  | 7.918000  | 17.895000 | 44.710000 |
| C  | 5.793000  | 18.101000 | 44.336000 |
| C  | 4.763000  | 17.788000 | 43.434000 |
| H  | 3.736000  | 18.091000 | 43.664000 |
| C  | 5.019000  | 17.083000 | 42.254000 |
| H  | 4.192000  | 16.828000 | 41.582000 |
| C  | 5.518000  | 18.869000 | 45.600000 |
| H  | 4.436000  | 18.944000 | 45.799000 |
| H  | 5.918000  | 19.897000 | 45.535000 |
| H  | 5.995000  | 18.392000 | 46.474000 |
| Cu | -2.472000 | 9.449000  | 39.996000 |
| Cu | -3.475000 | 11.954000 | 40.160000 |
| Cu | -4.806000 | 14.884000 | 39.832000 |
| Cu | -0.064000 | 13.845000 | 35.544000 |
| Cu | -1.350000 | 14.592000 | 37.548000 |
| Cu | 1.277000  | 12.846000 | 39.692000 |
| Cu | 2.158000  | 13.454000 | 34.279000 |
| Cu | 3.473000  | 14.638000 | 36.360000 |
| Cu | 1.192000  | 14.591000 | 37.601000 |
| Cu | -1.440000 | 15.847000 | 39.866000 |
| Cu | 1.469000  | 15.459000 | 39.978000 |
| Cu | 4.835000  | 14.750000 | 39.537000 |
| P  | 6.619000  | 15.804000 | 40.345000 |
| S  | 0.051000  | 14.136000 | 33.285000 |
| S  | 4.328000  | 14.120000 | 34.362000 |
| S  | 3.108000  | 15.925000 | 38.238000 |

|   |           |           |           |
|---|-----------|-----------|-----------|
| S | 3.002000  | 13.799000 | 40.887000 |
| S | 0.101000  | 16.752000 | 41.217000 |
| S | -3.022000 | 16.031000 | 38.192000 |
| C | -3.286000 | 10.261000 | 32.680000 |
| H | -3.923000 | 11.021000 | 32.194000 |
| C | -4.047000 | 9.619000  | 33.835000 |
| H | -4.365000 | 10.394000 | 34.550000 |
| H | -3.364000 | 8.942000  | 34.379000 |
| C | -5.259000 | 8.827000  | 33.318000 |
| H | -5.766000 | 8.337000  | 34.171000 |
| H | -5.997000 | 9.525000  | 32.873000 |
| C | -4.843000 | 7.789000  | 32.270000 |
| H | -4.201000 | 7.026000  | 32.754000 |
| H | -5.731000 | 7.256000  | 31.881000 |
| C | -4.070000 | 8.446000  | 31.122000 |
| H | -4.742000 | 9.132000  | 30.569000 |
| H | -3.735000 | 7.685000  | 30.392000 |
| C | -2.852000 | 9.235000  | 31.632000 |
| H | -2.122000 | 8.545000  | 32.093000 |
| H | -2.350000 | 9.745000  | 30.792000 |
| C | -5.295000 | 14.732000 | 33.479000 |
| H | -5.024000 | 15.154000 | 32.490000 |
| C | -5.707000 | 13.274000 | 33.283000 |
| H | -5.874000 | 12.813000 | 34.274000 |
| H | -4.874000 | 12.722000 | 32.819000 |
| C | -6.977000 | 13.156000 | 32.429000 |
| H | -6.759000 | 13.511000 | 31.401000 |
| H | -7.270000 | 12.093000 | 32.336000 |
| C | -8.130000 | 13.985000 | 33.010000 |
| H | -8.434000 | 13.553000 | 33.984000 |
| H | -9.017000 | 13.925000 | 32.350000 |
| C | -7.715000 | 15.448000 | 33.210000 |
| H | -8.535000 | 16.020000 | 33.685000 |
| H | -7.541000 | 15.915000 | 32.219000 |
| C | -6.441000 | 15.570000 | 34.061000 |
| H | -6.129000 | 16.628000 | 34.137000 |
| H | -6.646000 | 15.226000 | 35.093000 |
| C | -6.239000 | 12.061000 | 37.993000 |
| H | -6.646000 | 11.853000 | 38.999000 |
| C | -7.233000 | 12.905000 | 37.199000 |
| H | -7.448000 | 13.847000 | 37.728000 |
| H | -6.761000 | 13.184000 | 36.240000 |
| C | -8.528000 | 12.122000 | 36.933000 |



|   |           |           |           |
|---|-----------|-----------|-----------|
| H | -9.211000 | 12.740000 | 36.321000 |
| H | -9.048000 | 11.940000 | 37.894000 |
| C | -8.248000 | 10.783000 | 36.241000 |
| H | -9.186000 | 10.213000 | 36.110000 |
| H | -7.852000 | 10.975000 | 35.224000 |
| C | -7.223000 | 9.955000  | 37.026000 |
| H | -6.983000 | 9.023000  | 36.484000 |
| H | -7.664000 | 9.646000  | 37.995000 |
| C | -5.932000 | 10.747000 | 37.284000 |
| H | -5.214000 | 10.153000 | 37.875000 |
| H | -5.434000 | 10.970000 | 36.324000 |
| C | -2.364000 | 14.351000 | 42.796000 |
| H | -1.270000 | 14.481000 | 42.745000 |
| C | -2.981000 | 15.619000 | 43.387000 |
| H | -4.085000 | 15.552000 | 43.339000 |
| H | -2.680000 | 16.493000 | 42.784000 |
| C | -2.536000 | 15.794000 | 44.849000 |
| H | -1.443000 | 15.977000 | 44.870000 |
| H | -3.015000 | 16.694000 | 45.277000 |
| C | -2.863000 | 14.556000 | 45.692000 |
| H | -3.964000 | 14.438000 | 45.754000 |
| H | -2.501000 | 14.691000 | 46.729000 |
| C | -2.253000 | 13.291000 | 45.077000 |
| H | -2.534000 | 12.396000 | 45.663000 |
| H | -1.149000 | 13.359000 | 45.123000 |
| C | -2.690000 | 13.104000 | 43.613000 |
| H | -2.202000 | 12.221000 | 43.168000 |
| H | -3.777000 | 12.907000 | 43.575000 |
| C | -5.675000 | 9.475000  | 41.123000 |
| H | -5.814000 | 9.441000  | 40.030000 |
| C | -6.769000 | 10.346000 | 41.746000 |
| H | -6.735000 | 11.361000 | 41.314000 |
| H | -6.552000 | 10.462000 | 42.826000 |
| C | -8.163000 | 9.728000  | 41.566000 |
| H | -8.423000 | 9.715000  | 40.488000 |
| H | -8.921000 | 10.365000 | 42.062000 |
| C | -8.220000 | 8.298000  | 42.118000 |
| H | -8.076000 | 8.329000  | 43.217000 |
| H | -9.218000 | 7.853000  | 41.942000 |
| C | -7.125000 | 7.423000  | 41.495000 |
| H | -7.330000 | 7.292000  | 40.414000 |
| H | -7.141000 | 6.409000  | 41.940000 |
| C | -5.733000 | 8.047000  | 41.677000 |

|    |            |           |           |
|----|------------|-----------|-----------|
| H  | -5.475000  | 8.077000  | 42.754000 |
| H  | -4.960000  | 7.434000  | 41.183000 |
| C  | -3.264000  | 7.002000  | 37.371000 |
| H  | -3.372000  | 7.628000  | 36.470000 |
| C  | -2.784000  | 5.608000  | 36.962000 |
| H  | -2.593000  | 5.025000  | 37.883000 |
| H  | -1.832000  | 5.691000  | 36.412000 |
| C  | -3.844000  | 4.888000  | 36.114000 |
| H  | -3.490000  | 3.872000  | 35.858000 |
| H  | -3.969000  | 5.428000  | 35.154000 |
| C  | -5.193000  | 4.816000  | 36.840000 |
| H  | -5.089000  | 4.176000  | 37.739000 |
| H  | -5.954000  | 4.337000  | 36.195000 |
| C  | -5.662000  | 6.211000  | 37.271000 |
| H  | -6.608000  | 6.148000  | 37.841000 |
| H  | -5.878000  | 6.818000  | 36.370000 |
| C  | -4.596000  | 6.926000  | 38.117000 |
| H  | -4.929000  | 7.939000  | 38.396000 |
| H  | -4.441000  | 6.370000  | 39.060000 |
| C  | -7.947000  | 16.262000 | 39.569000 |
| C  | -8.915000  | 15.269000 | 39.339000 |
| H  | -8.913000  | 14.349000 | 39.935000 |
| C  | -9.892000  | 15.442000 | 38.354000 |
| H  | -10.635000 | 14.650000 | 38.192000 |
| C  | -9.927000  | 16.594000 | 37.554000 |
| C  | -8.966000  | 17.588000 | 37.800000 |
| H  | -8.978000  | 18.509000 | 37.203000 |
| C  | -7.991000  | 17.430000 | 38.787000 |
| H  | -7.259000  | 18.228000 | 38.954000 |
| H  | -11.788000 | 16.053000 | 36.580000 |
| H  | -0.065000  | 15.282000 | 36.583000 |
| Cu | -1.466000  | 11.405000 | 35.557000 |
| Cu | -1.396000  | 9.914000  | 37.589000 |
| C  | -8.950000  | 13.001000 | 45.595000 |
| H  | -9.662000  | 13.631000 | 46.153000 |
| H  | -9.494000  | 12.091000 | 45.279000 |
| C  | -6.137000  | 17.616000 | 41.392000 |
| C  | -5.100000  | 18.330000 | 40.768000 |
| H  | -4.527000  | 17.855000 | 39.965000 |
| C  | -4.775000  | 19.624000 | 41.181000 |
| H  | -3.968000  | 20.162000 | 40.672000 |
| C  | -5.439000  | 20.236000 | 42.254000 |
| C  | -6.450000  | 19.505000 | 42.897000 |

|    |           |           |           |
|----|-----------|-----------|-----------|
| H  | -6.973000 | 19.950000 | 43.751000 |
| C  | -6.803000 | 18.221000 | 42.470000 |
| H  | -7.597000 | 17.686000 | 43.000000 |
| H  | -3.981000 | 21.778000 | 42.689000 |
| H  | -5.613000 | 13.771000 | 42.388000 |
| H  | -8.155000 | 12.679000 | 46.288000 |
| Cu | -1.173000 | 13.187000 | 39.820000 |
| C  | -5.716000 | 11.604000 | 27.225000 |
| H  | -5.865000 | 12.326000 | 26.400000 |
| H  | -5.879000 | 10.596000 | 26.806000 |

**Table S7. The coordinate of the optimized geometry of  $\text{Cu}_{29}\text{-P(Ph-Cl)}_3^{\text{T}}$**

|    |           |           |           |
|----|-----------|-----------|-----------|
| Cu | 0.830000  | 1.469000  | -1.925000 |
| Cu | 1.156000  | 3.877000  | -1.225000 |
| Cu | 4.296000  | 3.911000  | -2.094000 |
| Cu | -3.352000 | 2.316000  | 1.452000  |
| Cu | -5.587000 | 2.487000  | -1.025000 |
| Cu | 3.606000  | 3.130000  | 0.680000  |
| Cu | -1.257000 | 0.874000  | 4.630000  |
| Cu | 0.803000  | -0.446000 | 6.193000  |
| Cu | -1.057000 | -1.927000 | 0.275000  |
| Cu | -0.264000 | -0.768000 | -2.010000 |
| Cu | 2.623000  | 0.817000  | -0.103000 |
| Cu | 1.548000  | -1.498000 | -0.192000 |
| Cu | -1.804000 | 1.210000  | -1.708000 |
| Cu | 0.751000  | -3.741000 | 0.987000  |
| Cu | 1.938000  | -1.893000 | -2.795000 |
| Cu | -2.575000 | 0.061000  | 0.536000  |
| Cu | -0.944000 | -0.751000 | 2.539000  |
| Cu | 1.632000  | -0.396000 | 2.055000  |
| Cu | 3.225000  | 0.804000  | -2.920000 |
| Cu | 1.514000  | 1.494000  | 3.755000  |
| Cu | -2.958000 | 3.512000  | -1.172000 |
| Cu | -0.851000 | 2.983000  | 0.078000  |
| Cu | 0.308000  | -4.842000 | -2.229000 |
| Cu | -0.992000 | 1.921000  | 2.366000  |
| Cu | -2.245000 | -2.471000 | -2.088000 |
| Cu | 1.257000  | 2.541000  | 1.406000  |
| Cu | -4.237000 | -0.170000 | -1.777000 |
| Cu | 1.069000  | -2.537000 | 3.615000  |
| S  | -1.276000 | -4.152000 | -0.508000 |
| S  | 2.072000  | -3.703000 | -0.982000 |
| Cl | 0.474000  | 2.176000  | 5.752000  |

|    |            |           |           |
|----|------------|-----------|-----------|
| S  | 2.380000   | 2.899000  | -3.138000 |
| S  | 0.469000   | -4.604000 | 3.073000  |
| S  | -0.894000  | -1.352000 | 4.864000  |
| S  | 2.306000   | -0.772000 | 4.352000  |
| S  | -3.903000  | 1.965000  | -2.611000 |
| S  | 4.593000   | 1.904000  | -0.929000 |
| S  | 4.020000   | -1.204000 | -3.409000 |
| S  | -0.213000  | -2.722000 | -3.433000 |
| S  | -0.998000  | 4.667000  | -1.600000 |
| S  | 3.101000   | 2.948000  | 2.858000  |
| S  | -4.828000  | 0.732000  | 0.356000  |
| S  | -2.960000  | 2.096000  | 3.735000  |
| S  | -4.520000  | -2.340000 | -2.119000 |
| Cl | 2.838000   | 5.265000  | -0.350000 |
| Cl | -4.301000  | 4.342000  | 0.583000  |
| P  | 0.486000   | -6.846000 | -3.250000 |
| P  | 5.713000   | 5.512000  | -2.750000 |
| P  | -7.532000  | 3.585000  | -1.184000 |
| P  | 1.133000   | -0.388000 | 8.409000  |
| Cl | -11.594000 | 1.145000  | -5.471000 |
| Cl | -11.006000 | 3.739000  | 4.174000  |
| Cl | -2.549000  | 3.687000  | 11.680000 |
| C  | 4.719000   | -1.292000 | -5.150000 |
| C  | 4.120000   | -1.119000 | 4.756000  |
| C  | 4.728000   | -3.314000 | -0.152000 |
| H  | 4.317000   | -2.988000 | 0.819000  |
| H  | 4.754000   | -2.433000 | -0.815000 |
| C  | -4.201000  | 2.459000  | -4.428000 |
| C  | 1.964000   | 3.498000  | -4.881000 |
| C  | 1.471000   | -7.221000 | 3.010000  |
| H  | 0.416000   | -7.515000 | 2.849000  |
| H  | 1.911000   | -7.019000 | 2.018000  |
| C  | -1.096000  | 6.447000  | -0.969000 |
| C  | 1.570000   | -8.093000 | -2.425000 |
| C  | 4.878000   | -2.769000 | -5.557000 |
| H  | 5.503000   | -3.292000 | -4.809000 |
| H  | 3.888000   | -3.259000 | -5.558000 |
| C  | 8.471000   | 0.512000  | -1.601000 |
| H  | 8.915000   | 0.178000  | -2.559000 |
| C  | 2.112000   | 6.329000  | 5.955000  |
| H  | 1.347000   | 5.676000  | 6.419000  |
| H  | 2.125000   | 7.274000  | 6.534000  |
| C  | -2.526000  | -5.336000 | 0.282000  |

|   |           |           |           |
|---|-----------|-----------|-----------|
| C | 8.654000  | 1.038000  | 1.291000  |
| H | 8.219000  | 1.375000  | 2.252000  |
| H | 9.702000  | 0.746000  | 1.498000  |
| C | 3.817000  | -4.386000 | -0.763000 |
| C | 4.833000  | 0.197000  | 5.103000  |
| H | 4.309000  | 0.699000  | 5.935000  |
| H | 4.804000  | 0.882000  | 4.237000  |
| C | 6.281000  | -2.102000 | 3.955000  |
| H | 6.779000  | -2.583000 | 3.092000  |
| C | 6.294000  | -0.114000 | 5.498000  |
| H | 6.803000  | 0.837000  | 5.748000  |
| C | 3.269000  | 3.511000  | -5.694000 |
| H | 3.995000  | 4.181000  | -5.201000 |
| H | 3.711000  | 2.499000  | -5.713000 |
| C | 4.550000  | 6.587000  | 5.396000  |
| H | 5.554000  | 6.121000  | 5.457000  |
| H | 4.600000  | 7.538000  | 5.961000  |
| C | -1.954000 | -3.315000 | -7.210000 |
| H | -2.834000 | -3.930000 | -7.479000 |
| C | 6.388000  | 6.154000  | -0.096000 |
| H | 5.952000  | 5.183000  | 0.150000  |
| C | 1.579000  | -8.652000 | 5.080000  |
| H | 0.528000  | -8.971000 | 4.937000  |
| H | 2.105000  | -9.485000 | 5.586000  |
| C | 7.149000  | 2.592000  | 0.009000  |
| H | 6.679000  | 2.953000  | 0.945000  |
| H | 7.117000  | 3.414000  | -0.727000 |
| C | 6.308000  | -3.048000 | 5.168000  |
| H | 7.354000  | -3.293000 | 5.436000  |
| H | 5.806000  | -4.003000 | 4.920000  |
| C | 2.204000  | -9.234000 | -0.364000 |
| H | 2.107000  | -9.365000 | 0.716000  |
| C | -5.343000 | -4.295000 | -3.930000 |
| H | -4.289000 | -4.418000 | -4.236000 |
| H | -5.496000 | -4.924000 | -3.034000 |
| C | 7.422000  | 8.210000  | 0.625000  |
| C | -1.710000 | -3.431000 | -5.688000 |
| H | -2.596000 | -3.104000 | -5.120000 |
| H | -1.517000 | -4.486000 | -5.420000 |
| C | -5.606000 | -2.821000 | -3.572000 |
| C | 1.154000  | -6.853000 | -4.974000 |
| C | 7.004000  | 0.918000  | -1.851000 |
| H | 6.427000  | 0.068000  | -2.254000 |

|   |           |           |           |
|---|-----------|-----------|-----------|
| H | 6.958000  | 1.733000  | -2.595000 |
| C | -0.761000 | -1.110000 | -5.662000 |
| H | -1.636000 | -0.740000 | -5.100000 |
| H | 0.103000  | -0.494000 | -5.354000 |
| C | 7.418000  | 8.688000  | -0.690000 |
| H | 7.810000  | 9.686000  | -0.908000 |
| C | 8.617000  | 2.184000  | 0.265000  |
| H | 9.167000  | 3.060000  | 0.659000  |
| C | 2.235000  | -8.362000 | 3.718000  |
| H | 2.196000  | -9.272000 | 3.087000  |
| C | -0.501000 | -2.574000 | -5.294000 |
| C | -3.588000 | 3.831000  | -4.733000 |
| H | -2.496000 | 3.805000  | -4.565000 |
| H | -3.995000 | 4.596000  | -4.047000 |
| C | 6.398000  | 0.250000  | 0.492000  |
| H | 5.926000  | 0.587000  | 1.434000  |
| H | 5.810000  | -0.606000 | 0.120000  |
| C | -8.580000 | 3.599000  | 0.333000  |
| C | 4.148000  | -2.047000 | 5.980000  |
| H | 3.591000  | -2.973000 | 5.757000  |
| H | 3.644000  | -1.548000 | 6.826000  |
| C | -2.215000 | -1.845000 | -7.581000 |
| H | -2.400000 | -1.758000 | -8.670000 |
| H | -3.124000 | -1.477000 | -7.071000 |
| C | -6.164000 | -0.220000 | 1.287000  |
| C | -2.477000 | 7.021000  | -1.338000 |
| H | -3.271000 | 6.435000  | -0.846000 |
| H | -2.630000 | 6.944000  | -2.432000 |
| C | 9.255000  | 1.719000  | -1.056000 |
| H | 10.314000 | 1.442000  | -0.887000 |
| H | 9.250000  | 2.543000  | -1.795000 |
| C | -8.030000 | -3.126000 | -4.237000 |
| H | -9.075000 | -3.018000 | -3.886000 |
| C | 3.495000  | 5.655000  | 6.018000  |
| H | 3.760000  | 5.441000  | 7.073000  |
| C | -0.997000 | -0.994000 | -7.183000 |
| H | -1.179000 | 0.068000  | -7.438000 |
| C | 8.509000  | -0.634000 | -0.577000 |
| H | 9.556000  | -0.949000 | -0.396000 |
| H | 7.969000  | -1.514000 | -0.973000 |
| C | 5.607000  | -2.369000 | 6.358000  |
| H | 5.607000  | -3.048000 | 7.234000  |
| C | 4.183000  | 6.862000  | 3.928000  |

|   |           |           |           |
|---|-----------|-----------|-----------|
| H | 4.944000  | 7.521000  | 3.466000  |
| C | -1.800000 | -6.632000 | 0.673000  |
| H | -1.365000 | -7.092000 | -0.234000 |
| H | -0.977000 | -6.402000 | 1.369000  |
| C | 1.412000  | 4.928000  | -4.800000 |
| H | 2.143000  | 5.580000  | -4.290000 |
| H | 0.484000  | 4.942000  | -4.201000 |
| C | 6.371000  | 1.387000  | -0.533000 |
| C | 7.202000  | 4.852000  | -3.614000 |
| C | 5.059000  | 6.784000  | -3.913000 |
| C | 6.390000  | 6.602000  | -1.426000 |
| C | 4.363000  | -4.821000 | -2.130000 |
| H | 4.366000  | -3.961000 | -2.820000 |
| H | 3.700000  | -5.598000 | -2.548000 |
| C | 2.483000  | -8.902000 | -3.127000 |
| H | 2.596000  | -8.795000 | -4.209000 |
| C | -0.887000 | 6.535000  | 0.547000  |
| H | 0.092000  | 6.103000  | 0.814000  |
| H | -1.660000 | 5.936000  | 1.058000  |
| C | 1.452000  | -8.268000 | -1.035000 |
| H | 0.767000  | -7.637000 | -0.460000 |
| C | 3.760000  | -5.608000 | 0.158000  |
| H | 3.330000  | -5.308000 | 1.128000  |
| H | 3.089000  | -6.368000 | -0.277000 |
| C | -0.013000 | 7.258000  | -1.702000 |
| H | -0.171000 | 7.185000  | -2.795000 |
| H | 0.983000  | 6.835000  | -1.484000 |
| C | 0.939000  | 2.576000  | -5.547000 |
| H | 0.010000  | 2.555000  | -4.949000 |
| H | 1.325000  | 1.542000  | -5.582000 |
| C | -4.715000 | 4.152000  | 4.332000  |
| H | -5.378000 | 3.363000  | 4.738000  |
| H | -4.906000 | 4.219000  | 3.248000  |
| C | 6.910000  | 6.946000  | 0.931000  |
| H | 6.901000  | 6.597000  | 1.966000  |
| C | 6.147000  | -3.896000 | 0.027000  |
| H | 6.798000  | -3.122000 | 0.475000  |
| C | -3.927000 | 1.773000  | -6.825000 |
| H | -3.487000 | 1.006000  | -7.490000 |
| C | 4.816000  | -1.796000 | 3.571000  |
| H | 4.778000  | -1.134000 | 2.688000  |
| H | 4.284000  | -2.726000 | 3.303000  |
| C | 6.899000  | 7.885000  | -1.708000 |

|   |           |           |           |
|---|-----------|-----------|-----------|
| H | 6.882000  | 8.274000  | -2.730000 |
| C | -6.627000 | 0.608000  | 2.494000  |
| H | -6.986000 | 1.596000  | 2.156000  |
| H | -5.778000 | 0.783000  | 3.179000  |
| C | -2.384000 | 6.064000  | 6.216000  |
| H | -2.574000 | 7.030000  | 6.721000  |
| H | -1.327000 | 5.798000  | 6.412000  |
| C | 6.701000  | -4.314000 | -1.348000 |
| H | 6.748000  | -3.434000 | -2.018000 |
| H | 7.732000  | -4.703000 | -1.242000 |
| C | 2.293000  | -6.849000 | -7.540000 |
| C | -0.962000 | 8.011000  | 0.992000  |
| H | -0.808000 | 8.061000  | 2.087000  |
| C | 1.700000  | 5.284000  | 3.703000  |
| H | 1.424000  | 5.464000  | 2.650000  |
| H | 0.939000  | 4.612000  | 4.134000  |
| C | -5.265000 | -5.995000 | 1.150000  |
| H | -5.802000 | -5.072000 | 0.862000  |
| H | -6.009000 | -6.675000 | 1.609000  |
| C | 7.867000  | -0.165000 | 0.741000  |
| H | 7.883000  | -0.992000 | 1.474000  |
| C | 0.732000  | -3.091000 | -6.043000 |
| H | 1.619000  | -2.517000 | -5.728000 |
| H | 0.914000  | -4.144000 | -5.772000 |
| C | -4.086000 | 6.588000  | 4.435000  |
| H | -4.258000 | 6.694000  | 3.347000  |
| H | -4.310000 | 7.569000  | 4.898000  |
| C | 1.631000  | -7.384000 | 5.949000  |
| H | 1.148000  | -7.579000 | 6.927000  |
| C | 6.114000  | -0.634000 | -5.119000 |
| H | 6.746000  | -1.135000 | -4.363000 |
| H | 6.012000  | 0.421000  | -4.804000 |
| C | 1.522000  | -5.945000 | 3.868000  |
| C | 3.074000  | 4.608000  | 3.769000  |
| C | -3.243000 | 3.769000  | 4.578000  |
| C | -2.253000 | -7.073000 | -3.794000 |
| H | -2.213000 | -5.984000 | -3.897000 |
| C | 6.328000  | -1.056000 | 6.713000  |
| H | 7.378000  | -1.263000 | 6.998000  |
| H | 5.843000  | -0.580000 | 7.585000  |
| C | -2.620000 | 6.199000  | 4.701000  |
| H | -1.946000 | 6.970000  | 4.280000  |
| C | 1.746000  | 6.613000  | 4.487000  |



|   |           |           |           |
|---|-----------|-----------|-----------|
| H | 0.749000  | 7.092000  | 4.438000  |
| C | 1.140000  | 5.448000  | -6.230000 |
| H | 0.744000  | 6.479000  | -6.162000 |
| C | 6.773000  | -0.722000 | -6.510000 |
| H | 7.772000  | -0.246000 | -6.468000 |
| C | 7.026000  | 3.749000  | -4.472000 |
| H | 6.033000  | 3.303000  | -4.590000 |
| C | 2.369000  | -6.188000 | -5.223000 |
| H | 2.870000  | -5.645000 | -4.417000 |
| C | 0.874000  | -6.245000 | 5.237000  |
| H | -0.187000 | -6.523000 | 5.090000  |
| H | 0.883000  | -5.328000 | 5.855000  |
| C | -7.343000 | -0.436000 | 0.326000  |
| H | -7.719000 | 0.547000  | -0.012000 |
| H | -6.997000 | -0.997000 | -0.560000 |
| C | 2.802000  | 7.539000  | 3.857000  |
| H | 2.536000  | 7.753000  | 2.803000  |
| H | 2.828000  | 8.510000  | 4.389000  |
| C | 3.855000  | -0.564000 | -6.187000 |
| H | 2.844000  | -1.000000 | -6.200000 |
| H | 3.739000  | 0.491000  | -5.883000 |
| C | -8.468000 | -1.203000 | 1.051000  |
| H | -9.308000 | -1.355000 | 0.344000  |
| C | -1.092000 | -7.783000 | -3.445000 |
| C | -8.691000 | 1.566000  | -2.729000 |
| H | -7.981000 | 0.914000  | -2.210000 |
| C | -5.406000 | -1.940000 | -4.810000 |
| H | -5.617000 | -0.890000 | -4.535000 |
| H | -4.354000 | -1.981000 | -5.135000 |
| C | 2.949000  | -6.196000 | -6.492000 |
| H | 3.895000  | -5.680000 | -6.676000 |
| C | -7.072000 | -2.680000 | -3.111000 |
| H | -7.239000 | -3.284000 | -2.200000 |
| H | -7.265000 | -1.625000 | -2.839000 |
| C | 1.074000  | -7.498000 | -7.326000 |
| H | 0.571000  | -8.001000 | -8.156000 |
| C | 4.139000  | 5.529000  | 3.148000  |
| H | 3.898000  | 5.716000  | 2.089000  |
| H | 5.127000  | 5.029000  | 3.186000  |
| C | -3.141000 | -4.687000 | 1.528000  |
| H | -3.639000 | -3.744000 | 1.244000  |
| H | -2.341000 | -4.440000 | 2.248000  |
| C | 5.787000  | -5.392000 | -1.959000 |

|   |           |           |           |
|---|-----------|-----------|-----------|
| H | 6.176000  | -5.692000 | -2.952000 |
| C | -4.781000 | 5.379000  | 6.529000  |
| H | -5.466000 | 4.624000  | 6.963000  |
| H | -5.003000 | 6.341000  | 7.031000  |
| C | 8.497000  | 5.373000  | -3.450000 |
| H | 8.669000  | 6.218000  | -2.775000 |
| C | 1.955000  | 3.084000  | -7.797000 |
| H | 1.754000  | 3.428000  | -8.830000 |
| H | 2.353000  | 2.053000  | -7.873000 |
| C | -2.317000 | 4.851000  | 4.015000  |
| H | -2.464000 | 4.932000  | 2.926000  |
| H | -1.266000 | 4.559000  | 4.184000  |
| C | 0.245000  | -1.500000 | -7.939000 |
| H | 0.087000  | -1.410000 | -9.032000 |
| H | 1.124000  | -0.877000 | -7.689000 |
| C | -2.805000 | -7.610000 | 1.321000  |
| H | -2.268000 | -8.536000 | 1.611000  |
| C | 2.805000  | 0.154000  | 8.970000  |
| C | 6.093000  | -5.121000 | 0.957000  |
| H | 7.111000  | -5.532000 | 1.107000  |
| H | 5.715000  | -4.822000 | 1.954000  |
| C | 7.005000  | -0.791000 | 4.315000  |
| H | 8.061000  | -1.000000 | 4.577000  |
| H | 7.016000  | -0.111000 | 3.447000  |
| C | -8.684000 | 2.950000  | -2.477000 |
| C | -6.248000 | 5.860000  | -2.209000 |
| H | -5.442000 | 5.164000  | -2.457000 |
| C | -7.930000 | -2.563000 | 1.524000  |
| H | -8.732000 | -3.136000 | 2.029000  |
| H | -7.597000 | -3.166000 | 0.657000  |
| C | -0.713000 | -3.822000 | -7.966000 |
| H | -0.527000 | -4.886000 | -7.727000 |
| H | -0.880000 | -3.758000 | -9.059000 |
| C | 0.654000  | 3.095000  | -6.975000 |
| H | -0.092000 | 2.429000  | -7.452000 |
| C | -2.268000 | -2.274000 | 5.784000  |
| C | 2.982000  | -5.536000 | 4.098000  |
| H | 3.004000  | -4.621000 | 4.715000  |
| H | 3.463000  | -5.284000 | 3.139000  |
| C | -3.468000 | -7.733000 | -3.993000 |
| H | -4.368000 | -7.175000 | -4.261000 |
| C | 3.901000  | 7.480000  | -3.516000 |
| H | 3.403000  | 7.222000  | -2.575000 |

|   |           |            |           |
|---|-----------|------------|-----------|
| C | 3.097000  | -6.969000  | 6.164000  |
| H | 3.151000  | -6.071000  | 6.813000  |
| H | 3.651000  | -7.775000  | 6.685000  |
| C | -5.626000 | -1.576000  | 1.752000  |
| H | -4.760000 | -1.427000  | 2.418000  |
| H | -5.279000 | -2.158000  | 0.880000  |
| C | -5.453000 | 1.823000   | -7.021000 |
| H | -5.904000 | 0.833000   | -6.815000 |
| H | -5.686000 | 2.069000   | -8.075000 |
| C | -2.759000 | -4.388000  | 7.049000  |
| H | -2.325000 | -5.350000  | 7.385000  |
| C | 0.516000  | -7.505000  | -6.042000 |
| H | -0.431000 | -8.030000  | -5.882000 |
| C | -5.015000 | 5.505000   | 5.014000  |
| H | -6.072000 | 5.777000   | 4.820000  |
| C | 1.427000  | -3.158000  | 8.578000  |
| H | 1.945000  | -3.046000  | 7.620000  |
| C | 0.505000  | -2.970000  | -7.566000 |
| H | 1.407000  | -3.338000  | -8.091000 |
| C | 0.137000  | 8.813000   | 0.273000  |
| H | 0.117000  | 9.871000   | 0.601000  |
| H | 1.133000  | 8.409000   | 0.537000  |
| C | -3.529000 | -9.119000  | -3.819000 |
| C | 3.257000  | -9.858000  | -2.461000 |
| H | 3.968000  | -10.481000 | -3.012000 |
| C | -1.684000 | -3.612000  | 6.258000  |
| H | -0.803000 | -3.427000  | 6.898000  |
| H | -1.341000 | -4.199000  | 5.389000  |
| C | 5.176000  | -6.191000  | 0.339000  |
| H | 5.121000  | -7.071000  | 1.010000  |
| C | -7.392000 | 5.385000   | -1.545000 |
| C | -5.724000 | 2.506000   | -4.627000 |
| H | -6.169000 | 3.243000   | -3.936000 |
| H | -6.164000 | 1.524000   | -4.379000 |
| C | 3.379000  | 8.509000   | -4.302000 |
| H | 2.484000  | 9.053000   | -3.987000 |
| C | 3.749000  | -6.675000  | 4.801000  |
| H | 4.802000  | -6.363000  | 4.950000  |
| C | 5.154000  | 8.152000   | -5.928000 |
| H | 5.635000  | 8.423000   | -6.873000 |
| C | -3.916000 | -7.947000  | 0.311000  |
| H | -4.635000 | -8.662000  | 0.757000  |
| H | -3.482000 | -8.435000  | -0.583000 |

|   |           |           |           |
|---|-----------|-----------|-----------|
| C | -7.805000 | -2.253000 | -5.485000 |
| H | -8.028000 | -1.192000 | -5.260000 |
| H | -8.496000 | -2.562000 | -6.294000 |
| C | -4.639000 | -6.650000 | -0.095000 |
| H | -5.430000 | -6.877000 | -0.837000 |
| C | 3.454000  | 4.325000  | 5.234000  |
| H | 4.440000  | 3.823000  | 5.272000  |
| H | 2.715000  | 3.642000  | 5.686000  |
| C | 4.014000  | 8.840000  | -5.505000 |
| C | -6.752000 | -2.335000 | 2.489000  |
| H | -6.355000 | -3.310000 | 2.828000  |
| C | -3.469000 | -2.520000 | 4.868000  |
| H | -3.154000 | -3.082000 | 3.973000  |
| H | -3.875000 | -1.551000 | 4.525000  |
| C | 6.923000  | -2.202000 | -6.909000 |
| H | 7.571000  | -2.727000 | -6.181000 |
| H | 7.415000  | -2.283000 | -7.898000 |
| C | -4.154000 | -5.665000 | 2.163000  |
| H | -4.599000 | -5.188000 | 3.056000  |
| C | -7.118000 | 8.107000  | -2.164000 |
| C | 9.382000  | 3.731000  | -4.985000 |
| C | -3.317000 | 4.980000  | 6.784000  |
| H | -3.141000 | 4.873000  | 7.872000  |
| C | -3.632000 | -5.667000 | -0.728000 |
| H | -4.140000 | -4.740000 | -1.039000 |
| H | -3.182000 | -6.120000 | -1.627000 |
| C | -2.554000 | 8.498000  | -0.892000 |
| H | -3.553000 | 8.899000  | -1.154000 |
| C | -1.462000 | 9.312000  | -1.607000 |
| H | -1.618000 | 9.279000  | -2.704000 |
| H | -1.518000 | 10.375000 | -1.304000 |
| C | -7.752000 | -4.598000 | -4.589000 |
| H | -7.929000 | -5.241000 | -3.706000 |
| H | -8.445000 | -4.939000 | -5.382000 |
| C | -6.345000 | -2.392000 | -5.950000 |
| H | -6.171000 | -1.752000 | -6.836000 |
| C | -3.017000 | 3.627000  | 6.094000  |
| H | -1.974000 | 3.325000  | 6.292000  |
| H | -3.681000 | 2.837000  | 6.499000  |
| C | -6.106000 | 7.212000  | -2.527000 |
| H | -5.209000 | 7.577000  | -3.035000 |
| C | 5.736000  | -6.617000 | -1.030000 |
| H | 5.097000  | -7.405000 | -1.475000 |

|   |            |            |           |
|---|------------|------------|-----------|
| H | 6.748000   | -7.049000  | -0.908000 |
| C | -3.584000  | 1.413000   | -5.360000 |
| H | -3.961000  | 0.410000   | -5.107000 |
| H | -2.489000  | 1.395000   | -5.219000 |
| C | 9.587000   | 4.816000   | -4.125000 |
| H | 10.595000  | 5.218000   | -3.987000 |
| C | -6.061000  | -3.862000  | -6.304000 |
| H | -5.021000  | -3.976000  | -6.663000 |
| H | -6.723000  | -4.188000  | -7.129000 |
| C | -1.178000  | -9.177000  | -3.280000 |
| H | -0.291000  | -9.756000  | -3.004000 |
| C | -6.293000  | -4.741000  | -5.062000 |
| H | -6.090000  | -5.801000  | -5.313000 |
| C | -8.391000  | 6.307000   | -1.180000 |
| H | -9.278000  | 5.972000   | -0.631000 |
| C | 3.269000   | 1.398000   | 8.500000  |
| H | 2.661000   | 1.978000   | 7.797000  |
| C | -7.760000  | -0.152000  | 3.219000  |
| H | -8.094000  | 0.451000   | 4.086000  |
| C | 8.103000   | 3.194000   | -5.164000 |
| H | 7.957000   | 2.337000   | -5.826000 |
| C | -2.705000  | -1.446000  | 6.998000  |
| H | -1.834000  | -1.259000  | 7.649000  |
| H | -3.096000  | -0.466000  | 6.663000  |
| C | -10.475000 | 1.837000   | -4.329000 |
| C | 3.107000   | -10.024000 | -1.083000 |
| C | -8.008000  | 4.089000   | 1.523000  |
| H | -6.967000  | 4.428000   | 1.530000  |
| C | 3.701000   | -7.945000  | 3.933000  |
| H | 4.193000   | -7.762000  | 2.960000  |
| H | 4.260000   | -8.764000  | 4.427000  |
| C | 2.988000   | 4.008000   | -7.127000 |
| H | 3.935000   | 3.994000   | -7.701000 |
| C | -9.587000  | 1.005000   | -3.640000 |
| H | -9.597000  | -0.073000  | -3.822000 |
| C | -3.329000  | 3.149000   | -7.152000 |
| H | -3.552000  | 3.426000   | -8.202000 |
| H | -2.232000  | 3.109000   | -7.060000 |
| C | 5.532000   | -2.861000  | -6.952000 |
| H | 5.637000   | -3.928000  | -7.235000 |
| C | -3.785000  | -2.219000  | 7.786000  |
| H | -4.095000  | -1.608000  | 8.656000  |
| C | -6.049000  | 2.886000   | -6.084000 |

|   |            |            |           |
|---|------------|------------|-----------|
| H | -7.148000  | 2.926000   | -6.205000 |
| C | -5.440000  | 4.266000   | -6.391000 |
| H | -5.678000  | 4.565000   | -7.431000 |
| H | -5.884000  | 5.032000   | -5.726000 |
| C | 3.604000   | -0.571000  | 9.868000  |
| H | 3.267000   | -1.540000  | 10.248000 |
| C | 5.674000   | 7.127000   | -5.128000 |
| H | 6.575000   | 6.599000   | -5.459000 |
| C | -10.466000 | 3.221000   | -4.121000 |
| H | -11.155000 | 3.860000   | -4.680000 |
| C | -2.346000  | 8.584000   | 0.632000  |
| H | -3.140000  | 8.018000   | 1.155000  |
| H | -2.421000  | 9.637000   | 0.964000  |
| C | -3.913000  | 4.206000   | -6.199000 |
| H | -3.466000  | 5.196000   | -6.416000 |
| C | -2.391000  | -9.846000  | -3.461000 |
| H | -2.458000  | -10.929000 | -3.324000 |
| C | -0.081000  | 8.732000   | -1.251000 |
| H | 0.713000   | 9.304000   | -1.771000 |
| C | 5.892000   | 0.005000   | -7.544000 |
| H | 5.794000   | 1.076000   | -7.275000 |
| H | 6.365000   | -0.033000  | -8.544000 |
| C | -3.422000  | -6.956000  | 2.572000  |
| H | -4.128000  | -7.658000  | 3.057000  |
| H | -2.630000  | -6.725000  | 3.309000  |
| C | -8.942000  | -0.376000  | 2.258000  |
| H | -9.761000  | -0.904000  | 2.784000  |
| H | -9.348000  | 0.596000   | 1.920000  |
| C | -3.965000  | -4.649000  | 6.131000  |
| H | -3.655000  | -5.262000  | 5.264000  |
| H | -4.742000  | -5.225000  | 6.672000  |
| C | 0.904000   | -2.022000  | 9.226000  |
| C | 0.106000   | 4.533000   | -6.906000 |
| H | -0.122000  | 4.900000   | -7.925000 |
| H | -0.839000  | 4.559000   | -6.333000 |
| C | 2.438000   | 5.443000   | -7.055000 |
| H | 3.187000   | 6.113000   | -6.595000 |
| H | 2.240000   | 5.829000   | -8.074000 |
| C | -7.230000  | -1.513000  | 3.699000  |
| H | -6.399000  | -1.362000  | 4.411000  |
| H | -8.025000  | -2.062000  | 4.240000  |
| C | -8.260000  | 7.664000   | -1.488000 |
| H | -9.032000  | 8.380000   | -1.196000 |

|   |            |           |           |
|---|------------|-----------|-----------|
| C | 4.649000   | -2.136000 | -7.985000 |
| H | 3.654000   | -2.617000 | -8.039000 |
| H | 5.101000   | -2.215000 | -8.993000 |
| C | -3.203000  | -3.560000 | 8.266000  |
| H | -3.964000  | -4.115000 | 8.850000  |
| H | -2.343000  | -3.385000 | 8.941000  |
| C | 4.503000   | -0.656000 | -7.583000 |
| H | 3.859000   | -0.131000 | -8.317000 |
| C | -9.910000  | 3.149000  | 0.353000  |
| H | -10.378000 | 2.763000  | -0.558000 |
| C | -4.994000  | -2.478000 | 6.870000  |
| H | -5.431000  | -1.516000 | 6.536000  |
| H | -5.787000  | -3.014000 | 7.428000  |
| C | -1.093000  | 1.288000  | 8.804000  |
| H | -1.367000  | 1.012000  | 7.784000  |
| C | 4.494000   | 1.910000  | 8.925000  |
| H | 4.847000   | 2.880000  | 8.564000  |
| C | -9.576000  | 3.768000  | -3.193000 |
| H | -9.579000  | 4.851000  | -3.034000 |
| C | 1.281000   | -4.433000 | 9.125000  |
| H | 1.692000   | -5.309000 | 8.617000  |
| C | 4.840000   | -0.071000 | 10.292000 |
| H | 5.463000   | -0.638000 | 10.989000 |
| C | -1.543000  | 2.567000  | 10.800000 |
| C | 0.432000   | 1.189000  | 10.678000 |
| H | 1.359000   | 0.832000  | 11.138000 |
| C | 0.079000   | 0.773000  | 9.379000  |
| C | -4.545000  | -3.306000 | 5.654000  |
| H | -5.407000  | -3.490000 | 4.987000  |
| C | -1.906000  | 2.182000  | 9.507000  |
| H | -2.809000  | 2.591000  | 9.049000  |
| C | -8.751000  | 4.141000  | 2.702000  |
| H | -8.305000  | 4.522000  | 3.626000  |
| C | -10.075000 | 3.688000  | 2.700000  |
| C | 5.275000   | 1.171000  | 9.822000  |
| C | -0.374000  | 2.077000  | 11.393000 |
| H | -0.097000  | 2.397000  | 12.401000 |
| C | 0.200000   | -2.201000 | 10.430000 |
| H | -0.239000  | -1.342000 | 10.946000 |
| C | -10.660000 | 3.190000  | 1.534000  |
| H | -11.697000 | 2.842000  | 1.548000  |
| C | 0.581000   | -4.584000 | 10.327000 |
| C | 0.035000   | -3.475000 | 10.980000 |

|    |           |            |           |
|----|-----------|------------|-----------|
| H  | -0.517000 | -3.614000  | 11.913000 |
| Cl | 8.058000  | 9.212000   | 1.903000  |
| Cl | 4.063000  | -11.217000 | -0.246000 |
| Cl | 2.998000  | -6.838000  | -9.136000 |
| Cl | 10.734000 | 3.027000   | -5.827000 |
| Cl | -5.048000 | -9.944000  | -4.041000 |
| Cl | 6.810000  | 1.805000   | 10.353000 |
| Cl | -6.942000 | 9.801000   | -2.539000 |
| Cl | 3.368000  | 10.125000  | -6.493000 |
| Cl | 0.376000  | -6.176000  | 11.008000 |
| Cu | -0.063000 | 0.505000   | 0.317000  |
| H  | -1.802000 | -0.971000  | -1.108000 |
| H  | 1.506000  | -0.479000  | -1.694000 |
| H  | 0.495000  | -1.932000  | 1.268000  |
| H  | 0.221000  | 0.617000   | 2.807000  |
| H  | -2.231000 | 1.834000   | -0.045000 |
| H  | 1.523000  | 2.224000   | -0.380000 |
| H  | 2.789000  | -0.632000  | 0.787000  |
| H  | -2.199000 | -1.314000  | 1.522000  |
| H  | -0.533000 | 0.838000   | -2.785000 |
| H  | -0.269000 | 3.346000   | 1.664000  |
